# Supplementary material
Source: Springer Nature journal article supplement (https://www.springermedizin.de/resource/supplementary/12943_2012_1047_MOESM1_ESM.pdf/9552194)
Supplement: MOESM1 [file 9552194]

## Supplementary data

### Figure S1. Expression of miR-146a in the gastrin KO mice and in human gastric cancer.

*In situ* hybridization detection of miR-146a expression. (A and B) miR-146a expression was absent in WT fundic mouse tissue, while miR-146a-positive cells (blue nuclei) were detected in the metaplastic fundic tissue from gastrin KO mice. (C and D) miR-146a expression was absent in normal human gastric tissue, while human gastric adenocarcinoma cells stained for miR-146a (blue nuclei). Original magnification x10, Scale bar = 100  $\mu$ m.

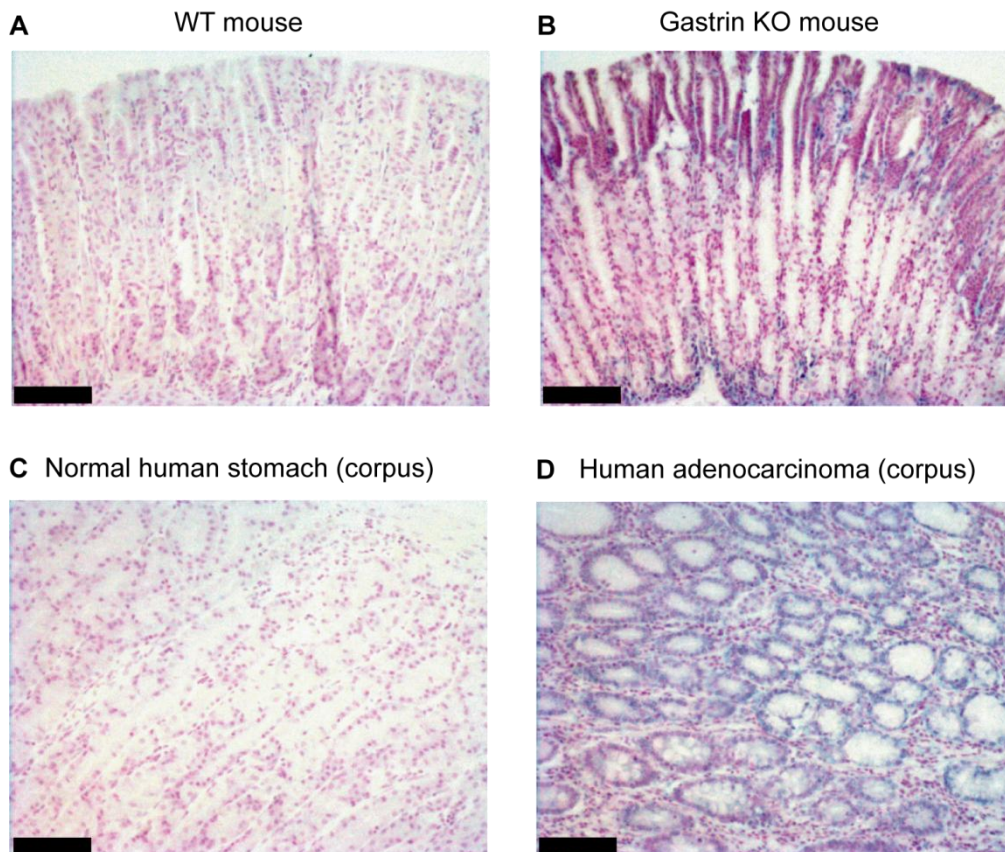

**Figure S2. Survival of gastric cancer patients with low or high tumor miR-146a expression.**

Kaplan-Meier overall survival curves according to miR-146a level. Although patients whose tumors have high expression of miR-146a seemed to have better survival than those with low expression, it was not significant,  $p = 0,31$  (Mantel-Cox Test). Low expression was defined as those with a relative miR-146a expression below the median expression and high expression had relative expression above median.

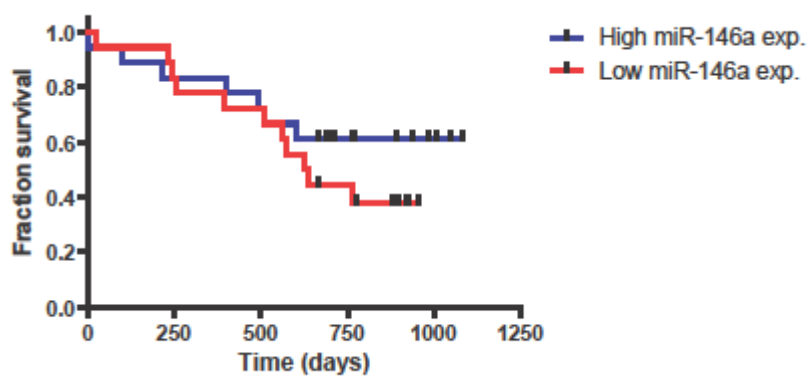

**Figure S3. Relative expression of miR-146a in cell lines.**

The expression of miR-146a in cells lines determined by qPCR. Gastric cancer cell lines are indicated by red bars. Relative miR-146a expression was determined using TaqMan® MicroRNA Assay hsa-miR-146a according to the manufacturer’s protocol (Applied Biosystems). miR-146a levels were normalized to hsa-miR-191 (Applied Biosystems), which served as an endogenous control.

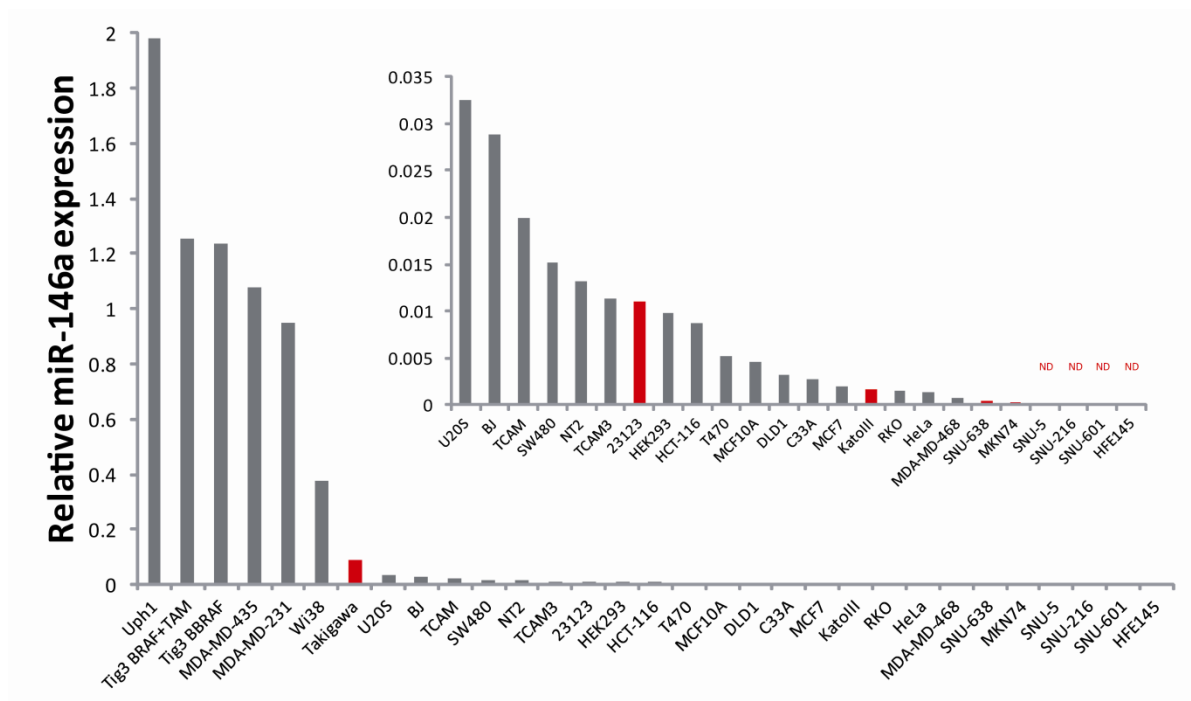

**Figure S4. Normal growth of SNU638 cells transfected with miR-146a in cell lines.**

2,5 10<sup>6</sup> SNU638 cells were seeded in 10 cm petri dishes and transfected the following day with 50 nM miR-146a, miCURY miR-146a inhibitor or Ctrl using Lipofectamine 2000 (Invitrogen). The following day the cell were transferred to 24-well plates where the cells were fixed at indicated time points in 4% paraformaldehyde, stained in a 0.1% crystal violet solution, and resuspended in 10% acetic acid. Sample absorbance was measured at 620 nm, and normalized to that of siGlo control transfected cells. Mean  $\pm$  S.D. n = 4 /day.

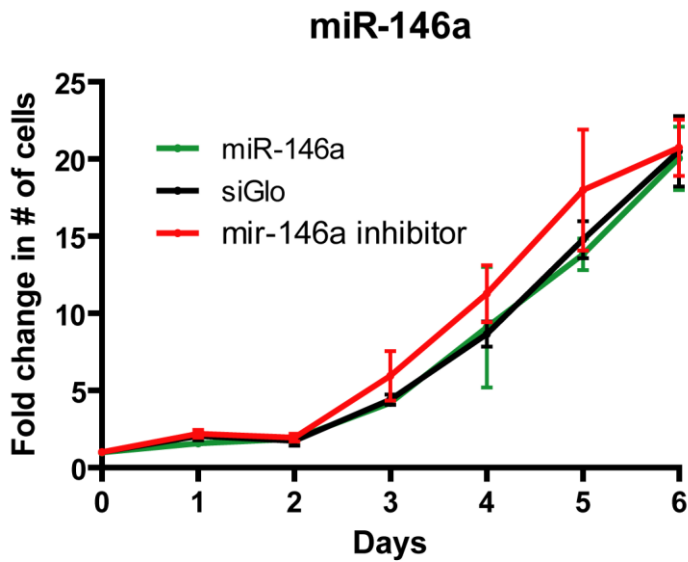

**Figure S5 Expression of the mammalian signalosome 8 subunits (GPS1 and COPS2-8) in SNU638 cells transfected with miR-146a.**

Alteration in the expression of one subunit has been reported to affect the expression of the others. Using qPCR the expression of the subunits (GPS1 and COPS2-8) was therefore examined in SNU638 cells transfected with miR-146a. Only COPS8 mRNA is a direct target of miR-146a, indicated by open bars. The absence of miR-146a target sites is indicated by closed bars. The expression of COPS8 and COPS2 was reduced following miR-146a transfection. Mean  $\pm$  S.D. \* =  $p < 0.05$ ,  $n = 4$ . COPS8 mRNA is directly targeted by miR-146a, while we assume that the expression of COPS2 is indirectly affected by miR-146a since the mRNA does not contain a miR-146a target site.

**Expression of the COP9 complex components following miR-146a over-expression**

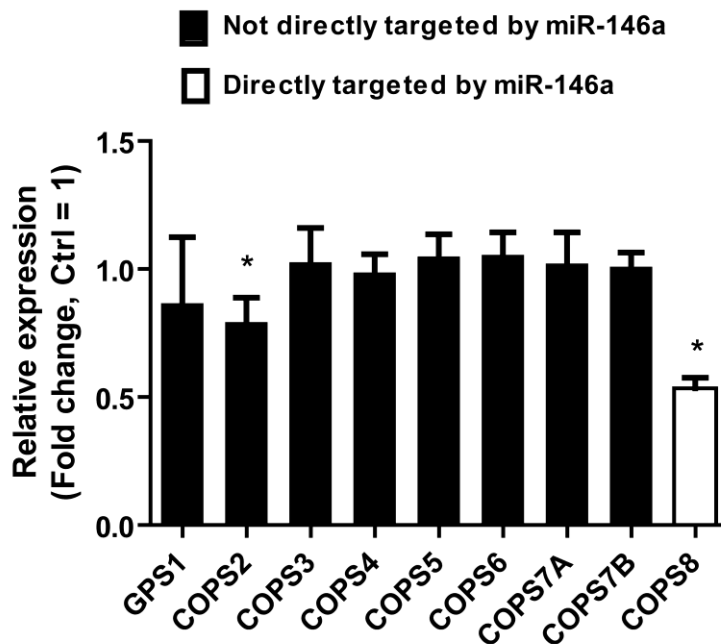

**Figure S6. Up-regulation of miR-146a in response to cancer-related cytokines.**

SNU638 cells were grown in media with 1% FCS overnight and subsequently stimulated with either LPA (10  $\mu$ M), IL-1 $\beta$  (10 ng/ml) or vehicle for 6 h. The expression of miR-146a was measured by qPCR and normalized to the expression of U44. miR-146a expression is shown relative to the average expression in the control. Data are the mean  $\pm$  S.D. (n = 4).

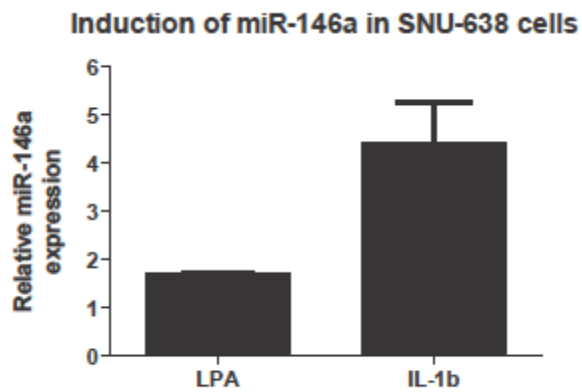

### **Figure S7 Monocyte migration Boyden chamber assay**

Monocyte migration against conditioned medium from control- or miR-146a-transfected SNU638 cells that were left untreated or stimulated with 25  $\mu$ M LPA was followed over 6 hours. Monocyte migration against medium from LPA-stimulated SNU638 cells was increased compared to migration against medium from untreated cells, while monocyte migration against medium from miR-146a-transfected, LPA-stimulated cells was decreased compared to medium from control-transfected, LPA-stimulated cells. Data are shown as mean  $\pm$  S.D, n = 3, \* = P < 0.05.

Monocytes were isolated as described. Monocytes were seeded in the upper chambers of Boyden chamber assay (Becton Dickinson, Heidelberg, Germany),  $2.5 \times 10^4$  cells/well were seeded in RPMI1640 medium containing 1%. The lower chambers contained conditioned medium from SNU638 cells that had been transfected with Ctrl, miR-146a, or miCURY-miR-146a inhibitor and the following day left untreated or treated with 25  $\mu$ M LPA (Avanti Polar Lipids) for 6 hours (n=3). After 120-minute incubation in 5% CO<sub>2</sub> at 37°C, non-migrating cells were scraped from the upper surface of the filter using a cotton plug. Cells on the lower surface were fixed with methanol and stained with methylene blue. The number of cells on the lower surface of the filter was determined microscopically by counting 3 high-power (x400) fields of constant area per well. To normalize all experiments, values were expressed as the fraction of number of cells that migrated through in the unconditioned control. Mean  $\pm$  S.D.

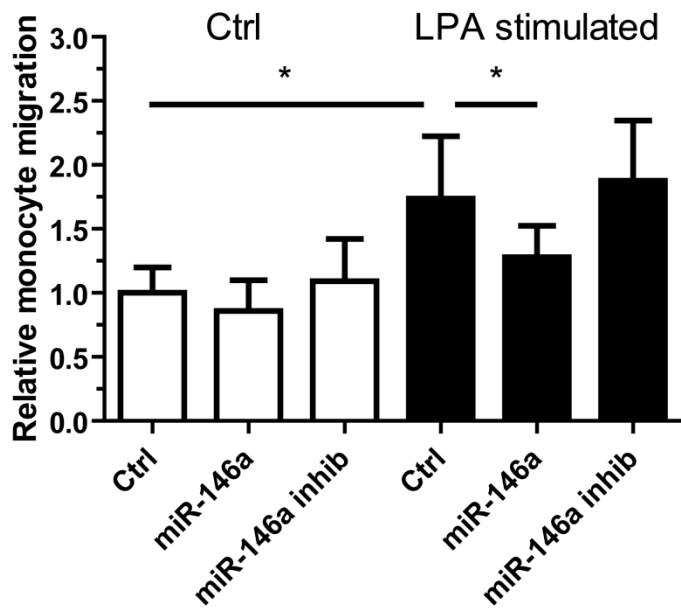



**Table S1 mRNA qRT-PCR primers (TAG Copenhagen, Copenhagen, Denmark)**

|           |                                    |
|-----------|------------------------------------|
| GAPDH FW  | 5'-CGACCACTTTGTCAAGCTCA-3'         |
| GAPDH RV  | 5'-GGTGGTCCAGGGTCTTACT-3'          |
| CARD10 FW | 5'-CACCGCACGCTGCAGAAGGA-3'         |
| CARD10 RV | 5'-CGGTCACGGCTCTGGATGGC-3'         |
| COPS8 FW  | 5'-ACGCTTGATGTAATGGGCAGAATCA-3'    |
| COPS8 RV  | 5'-AGCTGACCATACTGGGGGTGT-3'        |
| IRAK1 FW  | 5'-GGGCTGTGAAGACGCACGGT-3'         |
| IRAK1 RV  | 5'-TGGGAGCAGCCCAGGCATCT-3'         |
| IL6 FW    | 5'-AGATGTAGCCGCCACACA-3'           |
| IL6 RV    | 5'-CTGCCAGTGCCTCTTTGCTGCTTT-3'     |
| IL8 FW    | 5'-CTCTTGGCAGCCTCCTGATT-3'         |
| IL8 RV    | 5'-TATGCACTGACATCTAAGTTCTTTAGCA-3' |
| IL11 FW   | 5'-TCAGGGCACATGCCTCCCCT-3'         |
| IL11 RV   | 5'-CTGGCCACAGGCTCAGCACG-3'         |
| IL23A FW  | 5'-ATTTTCACAGGGGAGCCTTC-3'         |
| IL23A RV  | 5'-GACTGAGGCTTGAATCTGC-3'          |
| CCL5 FW   | 5'-TACATTGCCCGCCCACTGCC-3'         |
| CCL5 RV   | 5'-GGGTTGGCACACACTTGGCG-3'         |
| CSF1 FW   | 5'-AGGGCAGCCCCCTGACTCAG-3'         |
| CSF1 RV   | 5'-GGAGGATGGCCAGGGAGGGG-3'         |
| PDGFB FW  | 5'-TGAATCGCTGCTGGGCGCTCTTC-3'      |
| PDGFB RV  | 5'-AGGAGCGGATCGAGTGGTCACTC-3'      |

**Table S2** 3'UTR luciferase primers. Restriction sites are indicated with lower case letters (TAG Copenhagen).

|                 |                                      |
|-----------------|--------------------------------------|
| CARD10 3'UTR FW | 5'-TATAacgcgtGGCCTCTCACCCCAAGGCT-3'  |
| CARD10 3'UTR RV | 5'-TATAaagcttGCACGGTCCTGAGTGTGCCC-3' |
| COPS8 3'UTR FW  | 5'-TATAacgcgtAGCCTGCTCCAGTTCCCCCA-3' |
| COPS8 3'UTR RV  | 5'-TATAaagcttACGGCATGTGCTGGGACAGA-3' |

**Table S3** Mutagenesis primers

|               |                                                                   |
|---------------|-------------------------------------------------------------------|
| CARD10 Mut FW | 5'-CAGGTTTGCACACTCAAGAAGACATGGGCAGGCTCAGGTC-3'                    |
| CARD10 Mut RV | 5'-GACCTGAGCCTGCCCATGTCTTCTTGAGTGTGCAAACCTG-3'                    |
| COPS8 Mut FW  | 5'-CGTTATGCTGAATAGTTGTTGAAACAGAAGACATTTTGTAGTATTTAATAATCTGGATG-3' |
| COPS8 Mut RV  | 5'-CATCCAGATTATTAATACTACAAAATGTCTTCTGTTTCAACAACCTATTCAGCATAACG-3' |

**Table 4** Transcripts with predicted 3'UTR miR-146a target sites that were significantly down-regulated upon miR-146a transfection.

| probeset    | transcript      | HGNC symbol     | log2 fold change | p-value  | 3utr 6m | 3utr 7m | 3utr length |
|-------------|-----------------|-----------------|------------------|----------|---------|---------|-------------|
| 201587_s_at | ENST00000369980 | IRAK1           | -1.48            | 9.53E-04 | 2       | 2       | 1350        |
| 210026_s_at | ENST00000251973 | CARD10          | -1.04            | 8.60E-04 | 3       | 1       | 792         |
| 202141_s_at | ENST00000392008 | COPS8           | -1.01            | 2.75E-04 | 1       | 1       | 1102        |
| 227964_at   | ENST00000317568 | FRMD8           | -0.98            | 5.52E-03 | 2       | 1       | 2159        |
| 218140_x_at | ENST00000273406 | SRPRB           | -0.92            | 3.21E-04 | 2       | 2       | 913         |
| 222768_s_at | ENST00000203001 | TRMT6           | -0.87            | 4.19E-03 | 2       | 0       | 695         |
| 202656_s_at | ENST00000313349 | SERTAD2         | -0.86            | 3.20E-02 | 4       | 1       | 4305        |
| 204928_s_at | ENST00000263512 | SLC10A3         | -0.84            | 1.81E-04 | 1       | 1       | 198         |
| 222447_at   | ENST00000358154 | METTL9          | -0.84            | 5.13E-03 | 2       | 1       | 2038        |
| 225383_at   | ENST00000370249 | ZNF275          | -0.82            | 1.43E-04 | 2       | 0       | 3418        |
| 225383_at   | ENST00000346165 | ZNF275          | -0.82            | 1.43E-04 | 6       | 1       | 5153        |
| 204720_s_at | ENST00000263441 | DNAJC6          | -0.82            | 2.11E-03 | 3       | 0       | 2844        |
| 203497_at   | ENST00000300651 | MED1            | -0.81            | 1.21E-02 | 3       | 2       | 3179        |
| 224436_s_at | ENST00000351220 | NIPSNAP3A       | -0.81            | 8.00E-03 | 1       | 0       | 786         |
| 1555673_at  | ENST00000391591 | ENSG00000212904 | -0.81            | 4.10E-03 | 1       | 0       | 421         |
| 1555673_at  | ENST00000391418 | KRTAP2-3        | -0.81            | 4.10E-03 | 1       | 0       | 424         |
| 203740_at   | ENST00000258169 | MPHOSPH6        | -0.78            | 2.69E-03 | 1       | 1       | 569         |
| 202142_at   | ENST00000354371 | COPS8           | -0.78            | 6.99E-03 | 1       | 1       | 1102        |
| 215780_s_at | ENST00000372692 | SET             | -0.77            | 1.01E-02 | 1       | 0       | 478         |
| 218536_at   | ENST00000378386 | MRS2            | -0.77            | 2.44E-03 | 2       | 1       | 1887        |
| 229700_at   | ENST00000343332 | ZNF738          | -0.76            | 4.45E-04 | 2       | 2       | 639         |
| 229700_at   | ENST00000311015 | ZNF738          | -0.76            | 4.45E-04 | 3       | 2       | 1814        |
| 203342_at   | ENST00000376582 | TIMM17B         | -0.76            | 1.53E-03 | 1       | 1       | 280         |
| 203342_at   | ENST00000396779 | TIMM17B         | -0.76            | 1.53E-03 | 1       | 1       | 280         |
| 208990_s_at | ENST00000265866 | HNRNPH3         | -0.76            | 1.14E-02 | 1       | 0       | 1133        |
| 222728_s_at | ENST00000323981 | TAF1D           | -0.75            | 5.58E-03 | 1       | 1       | 1248        |
| 209094_at   | ENST00000284031 | DDAH1           | -0.72            | 2.92E-03 | 2       | 0       | 2966        |
| 231984_at   | ENST00000380172 | MTAP            | -0.71            | 9.72E-04 | 5       | 2       | 3954        |
| 209723_at   | ENST00000380698 | SERPINB9        | -0.71            | 2.88E-02 | 1       | 0       | 2889        |
| 202349_at   | ENST00000351698 | TOR1A           | -0.70            | 1.75E-04 | 1       | 1       | 1029        |
| 202071_at   | ENST00000372733 | SDC4            | -0.70            | 4.16E-02 | 1       | 0       | 1973        |
| 209476_at   | ENST00000267434 | TXNDC1          | -0.70            | 4.89E-03 | 1       | 1       | 1519        |
| 222653_at   | ENST00000225573 | PNPO            | -0.70            | 2.65E-02 | 4       | 1       | 2526        |
| 221705_s_at | ENST00000369526 | ENSG00000052723 | -0.68            | 2.54E-02 | 1       | 1       | 773         |
| 221705_s_at | ENST00000369528 | ENSG00000052723 | -0.68            | 2.54E-02 | 1       | 1       | 4792        |
| 225658_at   | ENST00000280098 | SPOPL           | -0.67            | 2.46E-03 | 2       | 1       | 4147        |
| 226843_s_at | ENST00000357464 | PAPD5           | -0.67            | 4.61E-02 | 2       | 0       | 5982        |
| 219361_s_at | ENST00000332810 | AEN             | -0.67            | 5.05E-03 | 2       | 1       | 1987        |
| 213287_s_at | ENST00000269576 | KRT10           | -0.66            | 5.57E-03 | 1       | 0       | 358         |
| 200825_s_at | ENST00000353883 | HYOU1           | -0.66            | 3.80E-03 | 2       | 1       | 1405        |
| 212440_at   | ENST00000244227 | SNRNP27         | -0.65            | 2.72E-02 | 2       | 1       | 908         |

|             |                 |                 |       |          |   |   |      |
|-------------|-----------------|-----------------|-------|----------|---|---|------|
| 230398_at   | ENST00000254051 | TNS4            | -0.65 | 9.93E-04 | 1 | 0 | 1758 |
| 213026_at   | ENST00000274459 | ATG12           | -0.65 | 4.06E-02 | 2 | 1 | 1686 |
| 210231_x_at | ENST00000372688 | SET             | -0.63 | 1.60E-02 | 1 | 0 | 478  |
| 210231_x_at | ENST00000372686 | SET             | -0.63 | 1.60E-02 | 1 | 0 | 1724 |
| 200772_x_at | ENST00000341369 | PTMAP4          | -0.63 | 4.14E-02 | 1 | 0 | 687  |
| 208802_at   | ENST00000342756 | SRP72           | -0.63 | 6.15E-03 | 1 | 1 | 1819 |
| 223135_s_at | ENST00000325805 | BBX             | -0.63 | 4.04E-02 | 1 | 0 | 393  |
| 212438_at   | ENST00000244227 | SNRNP27         | -0.63 | 1.60E-02 | 2 | 1 | 908  |
| 201542_at   | ENST00000373242 | SAR1A           | -0.63 | 2.12E-03 | 1 | 1 | 2272 |
| 207023_x_at | ENST00000269576 | KRT10           | -0.62 | 1.58E-03 | 1 | 0 | 358  |
| 218845_at   | ENST00000344450 | DUSP22          | -0.62 | 1.14E-02 | 2 | 0 | 485  |
| 224796_at   | ENST00000357668 | ASAP1           | -0.62 | 1.02E-02 | 1 | 1 | 2624 |
| 211998_at   | ENST00000254810 | H3F3B           | -0.60 | 5.11E-03 | 1 | 0 | 2159 |
| 208097_s_at | ENST00000267434 | TXNDC1          | -0.60 | 2.20E-02 | 1 | 1 | 1519 |
| 213518_at   | ENST00000295797 | PRKCI           | -0.60 | 1.98E-02 | 1 | 1 | 2855 |
| 223178_s_at | ENST00000319550 | NT5DC1          | -0.60 | 1.71E-03 | 2 | 0 | 1665 |
| 218150_at   | ENST00000295087 | ARL5A           | -0.60 | 2.13E-03 | 2 | 0 | 2310 |
| 200999_s_at | ENST00000378026 | CKAP4           | -0.59 | 3.88E-02 | 2 | 1 | 999  |
| 208095_s_at | ENST00000342756 | SRP72           | -0.59 | 4.27E-02 | 1 | 1 | 1819 |
| 200630_x_at | ENST00000372686 | SET             | -0.59 | 1.19E-02 | 1 | 0 | 1724 |
| 222557_at   | ENST00000370053 | ENSG00000197457 | -0.58 | 9.94E-03 | 1 | 1 | 422  |
| 222557_at   | ENST00000358145 | STMN3           | -0.58 | 9.94E-03 | 1 | 1 | 1612 |
| 208114_s_at | ENST00000368219 | ISG20L2         | -0.58 | 3.42E-02 | 1 | 0 | 746  |
| 203682_s_at | ENST00000249760 | IVD             | -0.58 | 4.81E-02 | 1 | 1 | 601  |
| 212766_s_at | ENST00000368219 | ISG20L2         | -0.58 | 6.01E-03 | 1 | 0 | 746  |
| 228026_at   | ENST00000369528 | ENSG00000052723 | -0.58 | 9.85E-03 | 1 | 1 | 4792 |
| 220987_s_at | ENST00000367157 | NUAK2           | -0.58 | 8.28E-03 | 2 | 0 | 1385 |
| 210633_x_at | ENST00000269576 | KRT10           | -0.57 | 8.02E-03 | 1 | 0 | 358  |
| 221568_s_at | ENST00000278193 | LIN7C           | -0.57 | 4.87E-03 | 1 | 1 | 4072 |
| 200777_s_at | ENST00000353957 | BZW1            | -0.57 | 1.28E-03 | 2 | 1 | 1658 |
| 201609_x_at | ENST00000343813 | ICMT            | -0.57 | 5.17E-03 | 1 | 0 | 3887 |
| 202933_s_at | ENST00000359834 | YES1            | -0.56 | 2.38E-02 | 1 | 1 | 2836 |
| 225471_s_at | ENST00000358335 | AKT2            | -0.56 | 2.34E-02 | 1 | 1 | 1136 |
| 225471_s_at | ENST00000392038 | AKT2            | -0.56 | 2.34E-02 | 1 | 1 | 3555 |
| 225471_s_at | ENST00000311278 | AKT2            | -0.56 | 2.34E-02 | 1 | 1 | 3555 |
| 214260_at   | ENST00000392008 | COPS8           | -0.55 | 7.53E-03 | 1 | 1 | 1102 |
| 214260_at   | ENST00000354371 | COPS8           | -0.55 | 7.53E-03 | 1 | 1 | 1102 |
| 224806_at   | ENST00000316881 | ENSG00000121060 | -0.55 | 4.16E-02 | 1 | 0 | 3791 |
| 201707_at   | ENST00000368072 | PEX19           | -0.55 | 2.77E-02 | 3 | 1 | 2734 |
| 222523_at   | ENST00000296257 | SENP2           | -0.55 | 5.06E-03 | 1 | 0 | 1251 |
| 216384_x_at | ENST00000341369 | PTMAP4          | -0.54 | 4.77E-02 | 1 | 0 | 687  |
| 222627_at   | ENST00000354504 | VPS54           | -0.54 | 6.44E-03 | 1 | 1 | 897  |
| 227696_at   | ENST00000288063 | EXOSC6          | -0.54 | 2.95E-03 | 3 | 1 | 4304 |
| 206023_at   | ENST00000264218 | NMU             | -0.54 | 3.48E-03 | 1 | 0 | 169  |
| 208549_x_at | ENST00000341369 | PTMAP4          | -0.53 | 3.56E-02 | 1 | 0 | 687  |
| 238121_at   | ENST00000392993 | GK5             | -0.53 | 2.57E-04 | 1 | 1 | 8095 |

|             |                 |                 |       |          |   |   |      |
|-------------|-----------------|-----------------|-------|----------|---|---|------|
| 200740_s_at | ENST00000332859 | SUMO2           | -0.53 | 1.79E-02 | 1 | 0 | 1334 |
| 218511_s_at | ENST00000225573 | PNPO            | -0.53 | 2.05E-03 | 4 | 1 | 2526 |
| 201726_at   | ENST00000351593 | ELAVL1          | -0.53 | 4.31E-02 | 1 | 1 | 1208 |
| 218624_s_at | ENST00000312426 | ENSG00000175487 | -0.52 | 2.20E-02 | 1 | 0 | 147  |
| 217815_at   | ENST00000216297 | SUPT16H         | -0.52 | 3.11E-02 | 2 | 0 | 1194 |
| 224993_at   | ENST00000252674 | MLLT1           | -0.52 | 8.92E-03 | 2 | 2 | 2660 |
| 211921_x_at | ENST00000341369 | PTMAP4          | -0.52 | 4.68E-02 | 1 | 0 | 687  |
| 213034_at   | ENST00000375288 | ENSG00000160584 | -0.52 | 4.05E-03 | 1 | 0 | 2239 |
| 213034_at   | ENST00000292055 | ENSG00000160584 | -0.52 | 4.05E-03 | 1 | 0 | 2239 |
| 213034_at   | ENST00000375300 | ENSG00000160584 | -0.52 | 4.05E-03 | 1 | 0 | 2241 |
| 201195_s_at | ENST00000261622 | SLC7A5P1        | -0.51 | 4.99E-02 | 1 | 0 | 2946 |
| 226360_at   | ENST00000332811 | ZNRF3           | -0.51 | 6.70E-04 | 4 | 1 | 3865 |
| 212621_at   | ENST00000300128 | TMEM194A        | -0.51 | 2.03E-02 | 3 | 1 | 4231 |
| 212621_at   | ENST00000379391 | TMEM194A        | -0.51 | 2.03E-02 | 3 | 1 | 4231 |
| 225309_at   | ENST00000216252 | PHF5A           | -0.51 | 3.11E-02 | 2 | 0 | 680  |
| 212532_s_at | ENST00000293406 | LSM12           | -0.51 | 3.62E-02 | 1 | 0 | 1572 |
| 217718_s_at | ENST00000353703 | YWHAB           | -0.51 | 1.67E-02 | 1 | 1 | 2081 |
| 218122_s_at | ENST00000296257 | SENP2           | -0.51 | 6.17E-04 | 1 | 0 | 1251 |
| 215088_s_at | ENST00000342751 | SDHC            | -0.51 | 3.27E-02 | 2 | 1 | 2200 |
| 215088_s_at | ENST00000367975 | SDHC            | -0.51 | 3.27E-02 | 3 | 2 | 2307 |
| 200631_s_at | ENST00000372686 | SET             | -0.51 | 3.42E-02 | 1 | 0 | 1724 |
| 206858_s_at | ENST00000394331 | HOXC6           | -0.50 | 4.57E-02 | 2 | 0 | 861  |
| 226276_at   | ENST00000308489 | TMEM167A        | -0.50 | 3.95E-02 | 1 | 0 | 917  |
| 223275_at   | ENST00000370078 | PRMT6           | -0.50 | 2.35E-02 | 1 | 0 | 1451 |
| 226926_at   | ENST00000379073 | DMKN            | -0.49 | 2.00E-02 | 1 | 1 | 692  |
| 202332_at   | ENST00000396832 | CSNK1E          | -0.49 | 1.83E-02 | 1 | 0 | 1279 |
| 209001_s_at | ENST00000354910 | ANAPC13         | -0.49 | 2.55E-02 | 2 | 0 | 882  |
| 209076_s_at | ENST00000269395 | WDR45L          | -0.49 | 6.47E-03 | 1 | 1 | 1342 |
| 209076_s_at | ENST00000392325 | WDR45L          | -0.49 | 6.47E-03 | 1 | 1 | 1342 |
| 202657_s_at | ENST00000313349 | SERTAD2         | -0.48 | 3.81E-02 | 4 | 1 | 4305 |
| 226617_at   | ENST00000295087 | ARL5A           | -0.48 | 3.71E-02 | 2 | 0 | 2310 |
| 223350_x_at | ENST00000278193 | LIN7C           | -0.48 | 8.97E-03 | 1 | 1 | 4072 |
| 227196_at   | ENST00000254260 | RHPN2           | -0.48 | 1.59E-02 | 1 | 0 | 1403 |
| 221582_at   | ENST00000366695 | HIST3H2A        | -0.48 | 1.65E-02 | 1 | 1 | 446  |
| 212872_s_at | ENST00000394251 | MED20           | -0.48 | 1.44E-03 | 3 | 1 | 1718 |
| 218187_s_at | ENST00000331434 | C8orf33         | -0.48 | 2.17E-03 | 1 | 0 | 1872 |
| 205128_x_at | ENST00000362012 | PTGS1           | -0.48 | 2.70E-04 | 2 | 0 | 3158 |
| 205128_x_at | ENST00000223423 | PTGS1           | -0.48 | 2.70E-04 | 2 | 0 | 3158 |
| 205128_x_at | ENST00000373698 | PTGS1           | -0.48 | 2.70E-04 | 2 | 0 | 1771 |
| 212434_at   | ENST00000264954 | GRPEL1          | -0.47 | 5.00E-03 | 1 | 1 | 807  |
| 223243_s_at | ENST00000318130 | EDEM3           | -0.47 | 4.26E-02 | 2 | 1 | 3560 |
| 208804_s_at | ENST00000244020 | SFRS6           | -0.47 | 2.20E-03 | 3 | 3 | 2538 |
| 201694_s_at | ENST00000239938 | EGR1            | -0.47 | 1.41E-02 | 2 | 0 | 1234 |
| 226032_at   | ENST00000350623 | CASP2           | -0.47 | 6.29E-03 | 2 | 1 | 2620 |
| 226032_at   | ENST00000310447 | CASP2           | -0.47 | 6.29E-03 | 2 | 1 | 2620 |
| 201661_s_at | ENST00000392065 | ENSG00000123983 | -0.46 | 4.44E-02 | 1 | 0 | 2985 |

|             |                 |                 |       |          |   |   |      |
|-------------|-----------------|-----------------|-------|----------|---|---|------|
| 204285_s_at | ENST00000269518 | PMAIP1          | -0.46 | 1.28E-02 | 1 | 1 | 1457 |
| 204285_s_at | ENST00000316660 | PMAIP1          | -0.46 | 1.28E-02 | 1 | 1 | 1553 |
| 213793_s_at | ENST00000334082 | HOMER1          | -0.46 | 7.79E-04 | 1 | 0 | 2045 |
| 213793_s_at | ENST00000282260 | HOMER1          | -0.46 | 7.79E-04 | 1 | 0 | 2045 |
| 213793_s_at | ENST00000399166 | HOMER1          | -0.46 | 7.79E-04 | 3 | 0 | 3373 |
| 221493_at   | ENST00000368608 | TSPYL1          | -0.46 | 4.27E-02 | 1 | 1 | 1939 |
| 231849_at   | ENST00000394815 | KRT80           | -0.46 | 2.19E-02 | 3 | 2 | 2402 |
| 231849_at   | ENST00000301446 | KRT80           | -0.46 | 2.19E-02 | 3 | 2 | 2402 |
| 231849_at   | ENST00000313234 | KRT80           | -0.46 | 2.19E-02 | 3 | 2 | 2527 |
| 224232_s_at | ENST00000303204 | PRELID1         | -0.46 | 6.51E-03 | 1 | 0 | 378  |
| 211754_s_at | ENST00000263255 | SLC25A17        | -0.46 | 6.27E-03 | 1 | 0 | 1197 |
| 219487_at   | ENST00000393262 | BBS10           | -0.45 | 9.19E-03 | 1 | 1 | 1327 |
| 219487_at   | ENST00000313898 | BBS10           | -0.45 | 9.19E-03 | 1 | 1 | 1327 |
| 213852_at   | ENST00000330165 | RBM8A           | -0.45 | 6.62E-03 | 1 | 0 | 2233 |
| 200702_s_at | ENST00000330836 | DDX24           | -0.45 | 1.49E-02 | 1 | 0 | 253  |
| 202143_s_at | ENST00000392008 | COPS8           | -0.45 | 5.96E-03 | 1 | 1 | 1102 |
| 202143_s_at | ENST00000354371 | COPS8           | -0.45 | 5.96E-03 | 1 | 1 | 1102 |
| 200776_s_at | ENST00000353957 | BZW1            | -0.44 | 4.59E-03 | 2 | 1 | 1658 |
| 202738_s_at | ENST00000299167 | PHKB            | -0.44 | 4.65E-03 | 1 | 1 | 374  |
| 202738_s_at | ENST00000323584 | PHKB            | -0.44 | 4.65E-03 | 2 | 1 | 879  |
| 200073_s_at | ENST00000313899 | HNRNPD          | -0.44 | 2.55E-02 | 1 | 1 | 871  |
| 200073_s_at | ENST00000352301 | HNRNPD          | -0.44 | 2.55E-02 | 1 | 1 | 871  |
| 200073_s_at | ENST00000353341 | HNRNPD          | -0.44 | 2.55E-02 | 1 | 1 | 871  |
| 200073_s_at | ENST00000307213 | HNRNPD          | -0.44 | 2.55E-02 | 1 | 1 | 351  |
| 212118_at   | ENST00000266119 | ENSG00000112448 | -0.43 | 3.08E-02 | 3 | 0 | 1068 |
| 212118_at   | ENST00000342248 | ENSG00000112448 | -0.43 | 3.08E-02 | 3 | 0 | 1253 |
| 212118_at   | ENST00000400720 | ENSG00000215641 | -0.43 | 3.08E-02 | 3 | 0 | 1068 |
| 212118_at   | ENST00000400719 | ENSG00000215641 | -0.43 | 3.08E-02 | 3 | 0 | 1253 |
| 212118_at   | ENST00000377199 | TRIM27          | -0.43 | 3.08E-02 | 3 | 0 | 1068 |
| 223155_at   | ENST00000300605 | HDHD2           | -0.43 | 1.39E-02 | 1 | 0 | 1271 |
| 218152_at   | ENST00000336216 | HMG20A          | -0.43 | 4.81E-02 | 2 | 1 | 2638 |
| 218152_at   | ENST00000381714 | HMG20A          | -0.43 | 4.81E-02 | 2 | 1 | 2638 |
| 204587_at   | ENST00000218197 | SLC25A14        | -0.43 | 1.33E-04 | 1 | 0 | 409  |
| 204587_at   | ENST00000339231 | SLC25A14        | -0.43 | 1.33E-04 | 1 | 0 | 409  |
| 204587_at   | ENST00000361980 | SLC25A14        | -0.43 | 1.33E-04 | 1 | 0 | 409  |
| 227477_at   | ENST00000298585 | ZMYND19         | -0.43 | 2.11E-03 | 1 | 0 | 464  |
| 219399_at   | ENST00000278193 | LIN7C           | -0.42 | 4.33E-03 | 1 | 1 | 4072 |
| 224320_s_at | ENST00000378886 | MCM8            | -0.42 | 1.98E-02 | 1 | 0 | 790  |
| 224320_s_at | ENST00000265187 | MCM8            | -0.42 | 1.98E-02 | 1 | 0 | 790  |
| 224320_s_at | ENST00000378896 | MCM8            | -0.42 | 1.98E-02 | 1 | 0 | 790  |
| 224320_s_at | ENST00000399350 | MCM8            | -0.42 | 1.98E-02 | 1 | 0 | 790  |
| 224320_s_at | ENST00000378883 | MCM8            | -0.42 | 1.98E-02 | 1 | 0 | 790  |
| 208112_x_at | ENST00000320631 | EHD1            | -0.42 | 1.75E-02 | 1 | 0 | 1597 |
| 208112_x_at | ENST00000359393 | EHD1            | -0.42 | 1.75E-02 | 1 | 0 | 1602 |
| 225498_at   | ENST00000217402 | CHMP4B          | -0.42 | 3.89E-02 | 1 | 0 | 803  |
| 226215_s_at | ENST00000377069 | FBXL10          | -0.42 | 3.64E-02 | 1 | 1 | 1017 |

|             |                 |          |       |          |   |   |      |
|-------------|-----------------|----------|-------|----------|---|---|------|
| 226215_s_at | ENST00000377071 | FBXL10   | -0.42 | 3.64E-02 | 1 | 1 | 1189 |
| 226215_s_at | ENST00000397480 | FBXL10   | -0.42 | 3.64E-02 | 1 | 1 | 1189 |
| 226215_s_at | ENST00000397478 | FBXL10   | -0.42 | 3.64E-02 | 1 | 1 | 1299 |
| 225997_at   | ENST00000309395 | MOBK1A   | -0.42 | 2.56E-02 | 4 | 2 | 6117 |
| 205398_s_at | ENST00000327367 | SMAD3    | -0.42 | 3.46E-02 | 1 | 0 | 4658 |
| 40189_at    | ENST00000372686 | SET      | -0.42 | 4.68E-02 | 1 | 0 | 1724 |
| 208837_at   | ENST00000299705 | TMED3    | -0.41 | 2.13E-02 | 1 | 0 | 626  |
| 225281_at   | ENST00000314400 | C3orf17  | -0.41 | 2.49E-02 | 2 | 1 | 3092 |
| 225281_at   | ENST00000383675 | C3orf17  | -0.41 | 2.49E-02 | 2 | 1 | 3092 |
| 225281_at   | ENST00000393857 | C3orf17  | -0.41 | 2.49E-02 | 2 | 1 | 3092 |
| 209039_x_at | ENST00000320631 | EHD1     | -0.41 | 2.90E-02 | 1 | 0 | 1597 |
| 209039_x_at | ENST00000359393 | EHD1     | -0.41 | 2.90E-02 | 1 | 0 | 1602 |
| 209037_s_at | ENST00000320631 | EHD1     | -0.41 | 7.06E-03 | 1 | 0 | 1597 |
| 209037_s_at | ENST00000359393 | EHD1     | -0.41 | 7.06E-03 | 1 | 0 | 1602 |
| 224630_at   | ENST00000378239 | C2orf30  | -0.41 | 4.53E-02 | 1 | 1 | 180  |
| 224630_at   | ENST00000185150 | C2orf30  | -0.41 | 4.53E-02 | 1 | 1 | 827  |
| 235177_at   | ENST00000272839 | FAM119A  | -0.41 | 4.11E-03 | 1 | 0 | 929  |
| 217752_s_at | ENST00000324262 | CNDP2    | -0.40 | 1.22E-02 | 1 | 1 | 1053 |
| 217752_s_at | ENST00000324301 | CNDP2    | -0.40 | 1.22E-02 | 1 | 1 | 1053 |
| 243013_at   | ENST00000393909 | MRPL19   | -0.40 | 2.60E-02 | 3 | 0 | 6923 |
| 222762_x_at | ENST00000273317 | LIMD1    | -0.40 | 4.74E-02 | 1 | 1 | 4204 |
| 213532_at   | ENST00000310823 | ADAM17   | -0.40 | 8.70E-03 | 1 | 1 | 893  |
| 201464_x_at | ENST00000371222 | JUN      | -0.40 | 2.99E-02 | 1 | 0 | 1287 |
| 214113_s_at | ENST00000330165 | RBM8A    | -0.40 | 7.04E-03 | 1 | 0 | 2233 |
| 227862_at   | ENST00000374108 | C1orf225 | -0.39 | 9.68E-03 | 1 | 0 | 1182 |
| 202337_at   | ENST00000368279 | BGLAP    | -0.39 | 1.38E-02 | 2 | 0 | 453  |
| 202337_at   | ENST00000368273 | BGLAP    | -0.39 | 1.38E-02 | 2 | 0 | 434  |
| 202337_at   | ENST00000368277 | BGLAP    | -0.39 | 1.38E-02 | 2 | 0 | 441  |
| 209059_s_at | ENST00000371649 | EDF1     | -0.39 | 4.54E-02 | 1 | 0 | 337  |
| 209059_s_at | ENST00000224073 | EDF1     | -0.39 | 4.54E-02 | 1 | 0 | 165  |
| 227016_at   | ENST00000262109 | ERICH1   | -0.39 | 3.17E-02 | 1 | 1 | 402  |
| 202716_at   | ENST00000371621 | PTPN1    | -0.39 | 1.24E-03 | 1 | 1 | 1836 |
| 220172_at   | ENST00000339506 | C2orf37  | -0.39 | 1.27E-02 | 4 | 1 | 3936 |
| 220172_at   | ENST00000375255 | C2orf37  | -0.39 | 1.27E-02 | 4 | 1 | 3936 |
| 206555_s_at | ENST00000381337 | THUMPD1  | -0.39 | 4.96E-02 | 2 | 0 | 2715 |
| 206555_s_at | ENST00000396083 | THUMPD1  | -0.39 | 4.96E-02 | 3 | 0 | 3211 |
| 225961_at   | ENST00000381271 | KLHDC5   | -0.39 | 5.83E-03 | 2 | 0 | 4873 |
| 202348_s_at | ENST00000351698 | TOR1A    | -0.39 | 1.26E-02 | 1 | 1 | 1029 |
| 209674_at   | ENST00000008527 | CRY1     | -0.39 | 2.81E-02 | 1 | 1 | 635  |
| 209674_at   | ENST00000319645 | CRY1     | -0.39 | 2.81E-02 | 1 | 1 | 635  |
| 236655_at   | ENST00000379097 | TPD52    | -0.38 | 4.58E-03 | 2 | 1 | 3244 |
| 236655_at   | ENST00000379096 | TPD52    | -0.38 | 4.58E-03 | 2 | 1 | 3244 |
| 222499_at   | ENST00000372945 | MRPS16   | -0.38 | 4.34E-02 | 1 | 0 | 2007 |
| 202647_s_at | ENST00000369535 | NRAS     | -0.38 | 2.01E-02 | 1 | 1 | 1130 |
| 225160_x_at | ENST00000296932 | GPR126   | -0.38 | 6.38E-03 | 1 | 1 | 2866 |
| 202149_at   | ENST00000379446 | NEDD9    | -0.38 | 2.94E-02 | 1 | 0 | 1861 |

|              |                 |                 |       |          |   |   |      |
|--------------|-----------------|-----------------|-------|----------|---|---|------|
| 202149_at    | ENST00000339240 | NEDD9           | -0.38 | 2.94E-02 | 1 | 0 | 1861 |
| 202149_at    | ENST00000397373 | NEDD9           | -0.38 | 2.94E-02 | 1 | 0 | 3199 |
| 201190_s_at  | ENST00000313486 | PITPNA          | -0.38 | 3.36E-02 | 1 | 0 | 2568 |
| 226727_at    | ENST00000325718 | MLLT6           | -0.37 | 4.70E-03 | 3 | 1 | 4180 |
| 201870_at    | ENST00000372813 | TOMM34          | -0.37 | 3.44E-02 | 1 | 0 | 978  |
| 201870_at    | ENST00000372810 | TOMM34          | -0.37 | 3.44E-02 | 1 | 0 | 890  |
| 218642_s_at  | ENST00000399611 | ENSG00000215121 | -0.37 | 1.57E-02 | 1 | 0 | 2424 |
| 205745_x_at  | ENST00000310823 | ADAM17          | -0.37 | 2.45E-02 | 1 | 1 | 893  |
| 212432_at    | ENST00000264954 | GRPEL1          | -0.37 | 1.28E-02 | 1 | 1 | 807  |
| 218069_at    | ENST00000319285 | ENSG00000179958 | -0.37 | 5.20E-03 | 1 | 0 | 533  |
| 226394_at    | ENST00000358935 | MARCH5          | -0.37 | 2.16E-02 | 1 | 1 | 2757 |
| 221481_x_at  | ENST00000307213 | HNRNPD          | -0.37 | 1.06E-02 | 1 | 1 | 351  |
| 221481_x_at  | ENST00000352301 | HNRNPD          | -0.37 | 1.06E-02 | 1 | 1 | 871  |
| 221481_x_at  | ENST00000353341 | HNRNPD          | -0.37 | 1.06E-02 | 1 | 1 | 871  |
| 221481_x_at  | ENST00000313899 | HNRNPD          | -0.37 | 1.06E-02 | 1 | 1 | 871  |
| 232071_at    | ENST00000393909 | MRPL19          | -0.37 | 1.59E-02 | 3 | 0 | 6923 |
| 225382_at    | ENST00000095634 | ZNF275          | -0.37 | 2.41E-03 | 2 | 0 | 3604 |
| 225382_at    | ENST00000370249 | ZNF275          | -0.37 | 2.41E-03 | 2 | 0 | 3418 |
| 225382_at    | ENST00000346165 | ZNF275          | -0.37 | 2.41E-03 | 6 | 1 | 5153 |
| 1568763_s_at | ENST00000343123 | ENSG00000188002 | -0.37 | 2.81E-02 | 2 | 0 | 1023 |
| 60474_at     | ENST00000399304 | FERMT1          | -0.37 | 3.12E-02 | 2 | 1 | 2431 |
| 60474_at     | ENST00000217289 | FERMT1          | -0.37 | 3.12E-02 | 3 | 2 | 2327 |
| 210110_x_at  | ENST00000265866 | HNRNPH3         | -0.37 | 5.77E-03 | 1 | 0 | 1133 |
| 200020_at    | ENST00000315091 | TARDBP          | -0.36 | 3.21E-02 | 1 | 0 | 935  |
| 200020_at    | ENST00000240185 | TARDBP          | -0.36 | 3.21E-02 | 1 | 0 | 2835 |
| 210588_x_at  | ENST00000265866 | HNRNPH3         | -0.36 | 2.98E-02 | 1 | 0 | 1133 |
| 207127_s_at  | ENST00000265866 | HNRNPH3         | -0.36 | 1.34E-02 | 1 | 0 | 1133 |
| 209632_at    | ENST00000264977 | PPP2R3A         | -0.36 | 1.41E-03 | 3 | 0 | 2725 |
| 209632_at    | ENST00000334546 | PPP2R3A         | -0.36 | 1.41E-03 | 3 | 0 | 2725 |
| 205322_s_at  | ENST00000373036 | MTF1            | -0.36 | 4.51E-02 | 3 | 1 | 5568 |
| 1555784_s_at | ENST00000369980 | IRAK1           | -0.36 | 4.35E-02 | 2 | 2 | 1350 |
| 1555784_s_at | ENST00000393687 | IRAK1           | -0.36 | 4.35E-02 | 2 | 2 | 1350 |
| 1555784_s_at | ENST00000369974 | IRAK1           | -0.36 | 4.35E-02 | 2 | 2 | 1350 |
| 1555784_s_at | ENST00000393682 | IRAK1           | -0.36 | 4.35E-02 | 2 | 2 | 1350 |
| 213320_at    | ENST00000330796 | PRMT3           | -0.36 | 3.13E-02 | 2 | 1 | 814  |
| 213320_at    | ENST00000331079 | PRMT3           | -0.36 | 3.13E-02 | 2 | 1 | 814  |
| 227935_s_at  | ENST00000371687 | PCGF5           | -0.36 | 1.82E-02 | 1 | 0 | 585  |
| 225634_at    | ENST00000242351 | ZC3HAV1         | -0.36 | 3.44E-02 | 1 | 0 | 4072 |
| 200050_at    | ENST00000301233 | ZNF146          | -0.36 | 4.93E-02 | 1 | 0 | 1445 |
| 200739_s_at  | ENST00000397898 | SUMO2           | -0.35 | 1.53E-02 | 1 | 0 | 1288 |
| 200739_s_at  | ENST00000332859 | SUMO2           | -0.35 | 1.53E-02 | 1 | 0 | 1334 |
| 47105_at     | ENST00000358896 | DUS2L           | -0.35 | 1.08E-02 | 1 | 1 | 316  |
| 201573_s_at  | ENST00000360541 | ETF1            | -0.35 | 2.79E-03 | 2 | 0 | 2206 |
| 208264_s_at  | ENST00000261868 | EIF3J           | -0.35 | 3.68E-02 | 3 | 1 | 1654 |
| 217527_s_at  | ENST00000320805 | NFATC2IP        | -0.35 | 4.19E-02 | 1 | 0 | 2581 |
| 213391_at    | ENST00000342856 | DPY19L4         | -0.35 | 4.18E-02 | 2 | 0 | 1924 |



|             |                 |                 |       |          |   |   |      |
|-------------|-----------------|-----------------|-------|----------|---|---|------|
| 213391_at   | ENST00000396156 | DPY19L4         | -0.35 | 4.18E-02 | 2 | 0 | 1924 |
| 213391_at   | ENST00000396155 | DPY19L4         | -0.35 | 4.18E-02 | 2 | 0 | 1924 |
| 218617_at   | ENST00000316891 | TRIT1           | -0.35 | 1.26E-02 | 2 | 1 | 708  |
| 218617_at   | ENST00000046894 | TRIT1           | -0.35 | 1.26E-02 | 2 | 1 | 708  |
| 218617_at   | ENST00000372825 | TRIT1           | -0.35 | 1.26E-02 | 2 | 1 | 708  |
| 218617_at   | ENST00000372818 | TRIT1           | -0.35 | 1.26E-02 | 2 | 1 | 693  |
| 218617_at   | ENST00000372823 | TRIT1           | -0.35 | 1.26E-02 | 2 | 1 | 708  |
| 229255_x_at | ENST00000393456 | GOSR2           | -0.35 | 5.24E-04 | 1 | 0 | 2607 |
| 213112_s_at | ENST00000389805 | SQSTM1          | -0.35 | 8.77E-03 | 2 | 2 | 1482 |
| 227447_at   | ENST00000230640 | SKIV2L2         | -0.35 | 2.02E-02 | 1 | 0 | 806  |
| 211471_s_at | ENST00000263116 | RAB36           | -0.34 | 1.38E-02 | 1 | 0 | 2780 |
| 211471_s_at | ENST00000341989 | RAB36           | -0.34 | 1.38E-02 | 1 | 0 | 2780 |
| 221549_at   | ENST00000253237 | GRWD1           | -0.34 | 4.74E-04 | 1 | 0 | 872  |
| 208093_s_at | ENST00000380025 | NDEL1           | -0.34 | 2.33E-03 | 1 | 1 | 1214 |
| 208093_s_at | ENST00000334527 | NDEL1           | -0.34 | 2.33E-03 | 1 | 1 | 1128 |
| 201535_at   | ENST00000380680 | UBL3            | -0.34 | 2.89E-02 | 1 | 0 | 2846 |
| 223363_at   | ENST00000288607 | PSMG3           | -0.34 | 1.31E-02 | 1 | 0 | 362  |
| 202306_at   | ENST00000301788 | POLR2G          | -0.34 | 4.50E-02 | 1 | 0 | 202  |
| 222738_at   | ENST00000281445 | WWC2            | -0.33 | 1.76E-03 | 3 | 2 | 5043 |
| 203364_s_at | ENST00000343175 | KIAA0652        | -0.33 | 6.43E-03 | 3 | 1 | 2180 |
| 203364_s_at | ENST00000312040 | KIAA0652        | -0.33 | 6.43E-03 | 3 | 1 | 2180 |
| 203364_s_at | ENST00000359513 | KIAA0652        | -0.33 | 6.43E-03 | 3 | 1 | 2180 |
| 211855_s_at | ENST00000218197 | SLC25A14        | -0.33 | 3.66E-03 | 1 | 0 | 409  |
| 211855_s_at | ENST00000339231 | SLC25A14        | -0.33 | 3.66E-03 | 1 | 0 | 409  |
| 211855_s_at | ENST00000361980 | SLC25A14        | -0.33 | 3.66E-03 | 1 | 0 | 409  |
| 227968_at   | ENST00000319863 | PDDC1           | -0.33 | 4.59E-02 | 3 | 2 | 3672 |
| 227968_at   | ENST00000354286 | PDDC1           | -0.33 | 4.59E-02 | 3 | 2 | 3672 |
| 220333_at   | ENST00000340965 | PAQR5           | -0.33 | 2.75E-02 | 3 | 1 | 3819 |
| 220333_at   | ENST00000395407 | PAQR5           | -0.33 | 2.75E-02 | 3 | 1 | 3825 |
| 203420_at   | ENST00000259963 | FAM8A1          | -0.33 | 9.50E-03 | 1 | 0 | 3379 |
| 209330_s_at | ENST00000352301 | HNRNPD          | -0.33 | 4.13E-03 | 1 | 1 | 871  |
| 209330_s_at | ENST00000313899 | HNRNPD          | -0.33 | 4.13E-03 | 1 | 1 | 871  |
| 215813_s_at | ENST00000362012 | PTGS1           | -0.33 | 1.15E-03 | 2 | 0 | 3158 |
| 215813_s_at | ENST00000223423 | PTGS1           | -0.33 | 1.15E-03 | 2 | 0 | 3158 |
| 215813_s_at | ENST00000373698 | PTGS1           | -0.33 | 1.15E-03 | 2 | 0 | 1771 |
| 229129_at   | ENST00000313899 | HNRNPD          | -0.33 | 2.18E-03 | 1 | 1 | 871  |
| 229129_at   | ENST00000352301 | HNRNPD          | -0.33 | 2.18E-03 | 1 | 1 | 871  |
| 229129_at   | ENST00000353341 | HNRNPD          | -0.33 | 2.18E-03 | 1 | 1 | 871  |
| 222703_s_at | ENST00000373044 | YRDC            | -0.32 | 2.75E-02 | 1 | 0 | 983  |
| 226284_at   | ENST00000325144 | ZBTB2           | -0.32 | 3.24E-02 | 3 | 2 | 1405 |
| 212280_x_at | ENST00000400772 | ENSG00000215697 | -0.32 | 3.76E-02 | 1 | 0 | 1642 |
| 212280_x_at | ENST00000337606 | ATG4B           | -0.32 | 3.76E-02 | 1 | 0 | 1649 |
| 224657_at   | ENST00000377482 | ERRFI1          | -0.32 | 7.56E-03 | 2 | 0 | 1475 |
| 233842_x_at | ENST00000023939 | C20orf43        | -0.32 | 1.66E-02 | 1 | 0 | 617  |
| 233842_x_at | ENST00000395881 | C20orf43        | -0.32 | 1.66E-02 | 1 | 0 | 795  |
| 233842_x_at | ENST00000357348 | C20orf43        | -0.32 | 1.66E-02 | 1 | 0 | 583  |

|              |                 |                 |       |          |   |   |       |
|--------------|-----------------|-----------------|-------|----------|---|---|-------|
| 225111_s_at  | ENST00000377026 | NAPB            | -0.32 | 7.23E-03 | 2 | 0 | 2847  |
| 225111_s_at  | ENST00000398425 | NAPB            | -0.32 | 7.23E-03 | 2 | 0 | 2847  |
| 221480_at    | ENST00000307213 | HNRNPD          | -0.32 | 5.00E-03 | 1 | 1 | 351   |
| 221480_at    | ENST00000352301 | HNRNPD          | -0.32 | 5.00E-03 | 1 | 1 | 871   |
| 221480_at    | ENST00000353341 | HNRNPD          | -0.32 | 5.00E-03 | 1 | 1 | 871   |
| 221480_at    | ENST00000313899 | HNRNPD          | -0.32 | 5.00E-03 | 1 | 1 | 871   |
| 226463_at    | ENST00000395862 | ATP6V1C1        | -0.32 | 4.64E-02 | 2 | 0 | 4310  |
| 225766_s_at  | ENST00000337273 | TNPO1           | -0.32 | 4.39E-02 | 1 | 1 | 8060  |
| 236012_at    | ENST00000333082 | PSMF1           | -0.32 | 1.44E-04 | 2 | 1 | 2702  |
| 236012_at    | ENST00000335877 | PSMF1           | -0.32 | 1.44E-04 | 3 | 2 | 3298  |
| 200947_s_at  | ENST00000277865 | GLUD1           | -0.32 | 3.07E-02 | 1 | 0 | 1261  |
| 200947_s_at  | ENST00000394415 | GLUD1           | -0.32 | 3.07E-02 | 1 | 0 | 1261  |
| 1560648_s_at | ENST00000368608 | TSPYL1          | -0.32 | 8.55E-03 | 1 | 1 | 1939  |
| 210378_s_at  | ENST00000322310 | SSNA1           | -0.32 | 3.32E-04 | 1 | 0 | 449   |
| 214210_at    | ENST00000263255 | SLC25A17        | -0.32 | 1.26E-03 | 1 | 0 | 1197  |
| 227617_at    | ENST00000340305 | TMEM201         | -0.32 | 2.18E-03 | 2 | 0 | 2657  |
| 242697_at    | ENST00000316433 | ENSG00000171817 | -0.32 | 1.84E-02 | 1 | 1 | 830   |
| 242697_at    | ENST00000343599 | ENSG00000171817 | -0.32 | 1.84E-02 | 1 | 1 | 830   |
| 223297_at    | ENST00000272647 | AMMECR1L        | -0.31 | 2.23E-02 | 1 | 1 | 3464  |
| 223297_at    | ENST00000393001 | AMMECR1L        | -0.31 | 2.23E-02 | 1 | 1 | 3457  |
| 224890_s_at  | ENST00000341942 | C7orf59         | -0.31 | 2.20E-02 | 1 | 0 | 246   |
| 244743_x_at  | ENST00000359735 | ZNF138          | -0.31 | 6.26E-03 | 2 | 2 | 1125  |
| 212451_at    | ENST00000261847 | ENSG00000138593 | -0.31 | 3.45E-02 | 2 | 0 | 3474  |
| 226180_at    | ENST00000323652 | WDR36           | -0.31 | 4.06E-02 | 2 | 1 | 3619  |
| 202706_s_at  | ENST00000232607 | UMPS            | -0.31 | 1.57E-02 | 1 | 1 | 697   |
| 223099_s_at  | ENST00000285737 | LONP2           | -0.31 | 3.66E-02 | 1 | 0 | 1694  |
| 227605_at    | ENST00000394701 | SCYE1           | -0.31 | 2.04E-02 | 1 | 0 | 1533  |
| 223907_s_at  | ENST00000314787 | ENSG00000104637 | -0.31 | 1.47E-02 | 1 | 0 | 436   |
| 223907_s_at  | ENST00000354846 | ENSG00000104637 | -0.31 | 1.47E-02 | 1 | 0 | 821   |
| 1552711_a_at | ENST00000332439 | CYB5D1          | -0.31 | 1.05E-02 | 4 | 1 | 2668  |
| 233873_x_at  | ENST00000358107 | PAPD1           | -0.31 | 4.77E-03 | 1 | 1 | 779   |
| 233873_x_at  | ENST00000263063 | PAPD1           | -0.31 | 4.77E-03 | 1 | 1 | 779   |
| 223707_at    | ENST00000314138 | RPL27A          | -0.31 | 2.13E-03 | 1 | 1 | 4049  |
| 201329_s_at  | ENST00000360938 | ETS2            | -0.31 | 4.93E-02 | 1 | 0 | 2066  |
| 201329_s_at  | ENST00000360214 | ETS2            | -0.31 | 4.93E-02 | 1 | 0 | 2066  |
| 201483_s_at  | ENST00000225504 | SUPT4H1         | -0.31 | 8.31E-03 | 1 | 0 | 1068  |
| 203495_at    | ENST00000292524 | LRRC14          | -0.31 | 1.80E-02 | 1 | 0 | 3695  |
| 45828_at     | ENST00000221943 | ATP5SL          | -0.31 | 1.65E-02 | 1 | 0 | 912   |
| 45828_at     | ENST00000301183 | ATP5SL          | -0.31 | 1.65E-02 | 1 | 0 | 953   |
| 217737_x_at  | ENST00000023939 | C20orf43        | -0.31 | 1.99E-02 | 1 | 0 | 617   |
| 217737_x_at  | ENST00000395881 | C20orf43        | -0.31 | 1.99E-02 | 1 | 0 | 795   |
| 217737_x_at  | ENST00000357348 | C20orf43        | -0.31 | 1.99E-02 | 1 | 0 | 583   |
| 229232_at    | ENST00000323443 | LRRC57          | -0.31 | 2.00E-02 | 2 | 1 | 1559  |
| 229232_at    | ENST00000397130 | LRRC57          | -0.31 | 2.00E-02 | 2 | 1 | 1555  |
| 211678_s_at  | ENST00000244061 | RNF114          | -0.30 | 3.65E-02 | 1 | 0 | 1742  |
| 224848_at    | ENST00000265734 | CDK6            | -0.30 | 8.20E-04 | 2 | 1 | 10215 |

|              |                 |                 |       |          |   |   |      |
|--------------|-----------------|-----------------|-------|----------|---|---|------|
| 225615_at    | ENST00000355609 | IFFO2           | -0.30 | 9.46E-03 | 1 | 0 | 4280 |
| 225615_at    | ENST00000304963 | IFFO2           | -0.30 | 9.46E-03 | 1 | 0 | 4280 |
| 1558044_s_at | ENST00000288063 | EXOSC6          | -0.30 | 1.88E-02 | 3 | 1 | 4304 |
| 227921_at    | ENST00000391598 | ENSG00000212911 | -0.30 | 4.66E-02 | 3 | 1 | 3278 |
| 209633_at    | ENST00000264977 | PPP2R3A         | -0.30 | 1.94E-03 | 3 | 0 | 2725 |
| 209633_at    | ENST00000334546 | PPP2R3A         | -0.30 | 1.94E-03 | 3 | 0 | 2725 |
| 209232_s_at  | ENST00000300087 | DCTN5           | -0.30 | 3.28E-02 | 2 | 1 | 2717 |
| 213302_at    | ENST00000314666 | PFAS            | -0.30 | 4.63E-02 | 1 | 0 | 1221 |
| 225765_at    | ENST00000337273 | TNPO1           | -0.30 | 3.55E-02 | 1 | 1 | 8060 |
| 219444_at    | ENST00000218147 | BCORL1          | -0.30 | 3.52E-02 | 1 | 1 | 1462 |
| 219444_at    | ENST00000303743 | BCORL1          | -0.30 | 3.52E-02 | 1 | 1 | 1462 |
| 219444_at    | ENST00000359304 | BCORL1          | -0.30 | 3.52E-02 | 2 | 1 | 2293 |
| 202737_s_at  | ENST00000252816 | LSM4            | -0.30 | 1.71E-02 | 1 | 0 | 554  |
| 231835_at    | ENST00000378425 | C1orf93         | -0.29 | 2.15E-02 | 1 | 1 | 2036 |
| 231835_at    | ENST00000378424 | C1orf93         | -0.29 | 2.15E-02 | 1 | 1 | 2049 |
| 231835_at    | ENST00000378427 | C1orf93         | -0.29 | 2.15E-02 | 1 | 1 | 2049 |
| 226651_at    | ENST00000334082 | HOMER1          | -0.29 | 1.48E-03 | 1 | 0 | 2045 |
| 226651_at    | ENST00000282260 | HOMER1          | -0.29 | 1.48E-03 | 1 | 0 | 2045 |
| 226651_at    | ENST00000399166 | HOMER1          | -0.29 | 1.48E-03 | 3 | 0 | 3373 |
| 212481_s_at  | ENST00000300933 | TPM4            | -0.29 | 2.66E-03 | 1 | 0 | 1252 |
| 214358_at    | ENST00000353139 | ACACA           | -0.29 | 2.02E-02 | 1 | 0 | 2318 |
| 218034_at    | ENST00000223136 | FIS1            | -0.29 | 4.23E-02 | 1 | 0 | 192  |
| 219683_at    | ENST00000240093 | FZD3            | -0.29 | 2.23E-03 | 1 | 0 | 1431 |
| 223898_at    | ENST00000366503 | ZNF670          | -0.29 | 3.39E-03 | 1 | 0 | 664  |
| 219648_at    | ENST00000263268 | CARD8           | -0.29 | 2.05E-02 | 2 | 0 | 2272 |
| 212063_at    | ENST00000278385 | CD44            | -0.29 | 3.68E-02 | 1 | 0 | 3066 |
| 212063_at    | ENST00000279452 | CD44            | -0.29 | 3.68E-02 | 1 | 0 | 3066 |
| 212063_at    | ENST00000352818 | CD44            | -0.29 | 3.68E-02 | 1 | 0 | 3066 |
| 212063_at    | ENST00000263398 | CD44            | -0.29 | 3.68E-02 | 1 | 0 | 3066 |
| 212063_at    | ENST00000278386 | CD44            | -0.29 | 3.68E-02 | 1 | 0 | 3112 |
| 218038_at    | ENST00000221943 | ATP5SL          | -0.29 | 4.81E-02 | 1 | 0 | 912  |
| 218038_at    | ENST00000301183 | ATP5SL          | -0.29 | 4.81E-02 | 1 | 0 | 953  |
| 222426_at    | ENST00000265960 | MAPKAP1         | -0.28 | 4.27E-02 | 1 | 0 | 1493 |
| 222426_at    | ENST00000350766 | MAPKAP1         | -0.28 | 4.27E-02 | 1 | 0 | 1493 |
| 222426_at    | ENST00000373511 | MAPKAP1         | -0.28 | 4.27E-02 | 1 | 0 | 1493 |
| 222426_at    | ENST00000373498 | MAPKAP1         | -0.28 | 4.27E-02 | 1 | 0 | 1493 |
| 222426_at    | ENST00000373505 | MAPKAP1         | -0.28 | 4.27E-02 | 1 | 0 | 1493 |
| 222426_at    | ENST00000373503 | MAPKAP1         | -0.28 | 4.27E-02 | 1 | 0 | 1493 |
| 222426_at    | ENST00000394063 | MAPKAP1         | -0.28 | 4.27E-02 | 1 | 0 | 1493 |
| 222426_at    | ENST00000373497 | MAPKAP1         | -0.28 | 4.27E-02 | 1 | 0 | 2393 |
| 222221_x_at  | ENST00000320631 | EHD1            | -0.28 | 4.77E-02 | 1 | 0 | 1597 |
| 222221_x_at  | ENST00000359393 | EHD1            | -0.28 | 4.77E-02 | 1 | 0 | 1602 |
| 218602_s_at  | ENST00000380496 | FAM29A          | -0.28 | 1.91E-02 | 1 | 1 | 1332 |
| 217819_at    | ENST00000276530 | GOLGA7          | -0.28 | 3.38E-02 | 1 | 0 | 1406 |
| 217819_at    | ENST00000357743 | GOLGA7          | -0.28 | 3.38E-02 | 1 | 0 | 1406 |
| 239135_at    | ENST00000261660 | ENSG00000103381 | -0.28 | 2.26E-02 | 2 | 1 | 5086 |

|             |                 |                 |       |          |   |   |      |
|-------------|-----------------|-----------------|-------|----------|---|---|------|
| 239101_at   | ENST00000262650 | ITCH            | -0.28 | 1.33E-02 | 4 | 2 | 3598 |
| 239101_at   | ENST00000374864 | ITCH            | -0.28 | 1.33E-02 | 4 | 2 | 3598 |
| 218570_at   | ENST00000395288 | KBTBD4          | -0.28 | 4.34E-02 | 1 | 0 | 732  |
| 218570_at   | ENST00000357777 | KBTBD4          | -0.28 | 4.34E-02 | 1 | 0 | 732  |
| 218570_at   | ENST00000359900 | KBTBD4          | -0.28 | 4.34E-02 | 1 | 0 | 1362 |
| 219736_at   | ENST00000282369 | TRIM36          | -0.28 | 2.99E-03 | 1 | 1 | 1722 |
| 41386_i_at  | ENST00000254846 | JMJD3           | -0.28 | 4.32E-02 | 1 | 0 | 1267 |
| 224738_x_at | ENST00000372871 | RPL7L1          | -0.28 | 3.85E-02 | 1 | 0 | 3432 |
| 203338_at   | ENST00000337537 | PPP2R5E         | -0.28 | 2.99E-03 | 1 | 0 | 1372 |
| 203160_s_at | ENST00000373479 | RNF8            | -0.28 | 4.72E-02 | 1 | 1 | 483  |
| 203160_s_at | ENST00000229866 | RNF8            | -0.28 | 4.72E-02 | 2 | 2 | 3885 |
| 224613_s_at | ENST00000360864 | DNAJC5          | -0.28 | 3.77E-02 | 2 | 0 | 2473 |
| 226850_at   | ENST00000272902 | SUMF1           | -0.28 | 4.13E-02 | 1 | 1 | 998  |
| 226850_at   | ENST00000383843 | SUMF1           | -0.28 | 4.13E-02 | 1 | 1 | 998  |
| 239377_at   | ENST00000312234 | EIF1AD          | -0.27 | 1.78E-03 | 1 | 0 | 2053 |
| 233255_s_at | ENST00000257336 | BIVM            | -0.27 | 6.56E-03 | 1 | 1 | 1666 |
| 235005_at   | ENST00000319194 | DIS3L           | -0.27 | 9.54E-03 | 2 | 1 | 585  |
| 201076_at   | ENST00000355257 | NHP2L1          | -0.27 | 1.22E-02 | 2 | 0 | 997  |
| 201076_at   | ENST00000215956 | NHP2L1          | -0.27 | 1.22E-02 | 2 | 0 | 997  |
| 217961_at   | ENST00000273158 | SLC25A38        | -0.27 | 1.64E-02 | 1 | 0 | 707  |
| 223160_s_at | ENST00000337238 | ENSG00000100796 | -0.27 | 3.60E-02 | 1 | 0 | 1148 |
| 217808_s_at | ENST00000265960 | MAPKAP1         | -0.27 | 4.93E-02 | 1 | 0 | 1493 |
| 217808_s_at | ENST00000350766 | MAPKAP1         | -0.27 | 4.93E-02 | 1 | 0 | 1493 |
| 217808_s_at | ENST00000373511 | MAPKAP1         | -0.27 | 4.93E-02 | 1 | 0 | 1493 |
| 217808_s_at | ENST00000373498 | MAPKAP1         | -0.27 | 4.93E-02 | 1 | 0 | 1493 |
| 217808_s_at | ENST00000373505 | MAPKAP1         | -0.27 | 4.93E-02 | 1 | 0 | 1493 |
| 217808_s_at | ENST00000373503 | MAPKAP1         | -0.27 | 4.93E-02 | 1 | 0 | 1493 |
| 217808_s_at | ENST00000394063 | MAPKAP1         | -0.27 | 4.93E-02 | 1 | 0 | 1493 |
| 217808_s_at | ENST00000373497 | MAPKAP1         | -0.27 | 4.93E-02 | 1 | 0 | 2393 |
| 227237_x_at | ENST00000378737 | ATAD3B          | -0.27 | 3.76E-02 | 1 | 0 | 384  |
| 227237_x_at | ENST00000308647 | ATAD3B          | -0.27 | 3.76E-02 | 1 | 0 | 384  |
| 227237_x_at | ENST00000360489 | ATAD3B          | -0.27 | 3.76E-02 | 1 | 0 | 384  |
| 227237_x_at | ENST00000378759 | ATAD3C          | -0.27 | 3.76E-02 | 1 | 0 | 612  |
| 227237_x_at | ENST00000339113 | ATAD3C          | -0.27 | 3.76E-02 | 1 | 0 | 612  |
| 227237_x_at | ENST00000378756 | ATAD3C          | -0.27 | 3.76E-02 | 1 | 0 | 613  |
| 227237_x_at | ENST00000378755 | ATAD3C          | -0.27 | 3.76E-02 | 1 | 0 | 612  |
| 227983_at   | ENST00000280571 | RILPL2          | -0.27 | 1.59E-02 | 1 | 0 | 502  |
| 227737_at   | ENST00000273406 | SRPRB           | -0.27 | 1.97E-03 | 2 | 2 | 913  |
| 227204_at   | ENST00000353265 | PARD6G          | -0.27 | 1.13E-02 | 2 | 2 | 2531 |
| 222006_at   | ENST00000302787 | LETM1           | -0.27 | 1.48E-02 | 1 | 0 | 1391 |
| 217997_at   | ENST00000266671 | PHLDA1          | -0.27 | 4.12E-02 | 1 | 0 | 4672 |
| 218727_at   | ENST00000219320 | SLC38A7         | -0.27 | 3.71E-02 | 1 | 1 | 991  |
| 201053_s_at | ENST00000333082 | PSMF1           | -0.27 | 2.57E-02 | 2 | 1 | 2702 |
| 201053_s_at | ENST00000335877 | PSMF1           | -0.27 | 2.57E-02 | 3 | 2 | 3298 |
| 201466_s_at | ENST00000371222 | JUN             | -0.27 | 2.55E-02 | 1 | 0 | 1287 |
| 223518_at   | ENST00000377036 | DFFA            | -0.27 | 5.80E-04 | 2 | 1 | 2486 |

|              |                 |                 |       |          |   |   |      |
|--------------|-----------------|-----------------|-------|----------|---|---|------|
| 210819_x_at  | ENST00000388841 | DIO2            | -0.26 | 7.57E-03 | 2 | 1 | 2610 |
| 203068_at    | ENST00000377658 | KLHL21          | -0.26 | 2.49E-02 | 1 | 0 | 2640 |
| 203068_at    | ENST00000377663 | KLHL21          | -0.26 | 2.49E-02 | 2 | 0 | 4641 |
| 228698_at    | ENST00000304501 | SOX7            | -0.26 | 9.73E-03 | 1 | 0 | 1970 |
| 226518_at    | ENST00000228495 | KCTD10          | -0.26 | 4.27E-02 | 3 | 0 | 2940 |
| 222584_at    | ENST00000245564 | MSTO1           | -0.26 | 4.50E-02 | 1 | 1 | 693  |
| 218296_x_at  | ENST00000245564 | MSTO1           | -0.26 | 1.56E-02 | 1 | 1 | 693  |
| 225659_at    | ENST00000280098 | SPOPL           | -0.26 | 2.79E-02 | 2 | 1 | 4147 |
| 202515_at    | ENST00000346964 | DLG1            | -0.26 | 3.60E-02 | 1 | 1 | 2063 |
| 202515_at    | ENST00000314062 | DLG1            | -0.26 | 3.60E-02 | 1 | 1 | 2063 |
| 202515_at    | ENST00000381807 | DLG1            | -0.26 | 3.60E-02 | 1 | 1 | 2063 |
| 202515_at    | ENST00000357674 | DLG1            | -0.26 | 3.60E-02 | 1 | 1 | 2063 |
| 202515_at    | ENST00000359922 | DLG1            | -0.26 | 3.60E-02 | 1 | 1 | 2063 |
| 213206_at    | ENST00000393456 | GOSR2           | -0.26 | 3.24E-02 | 1 | 0 | 2607 |
| 218867_s_at  | ENST00000261318 | C12orf49        | -0.26 | 1.80E-02 | 2 | 0 | 2017 |
| 201513_at    | ENST00000389682 | TSN             | -0.26 | 2.26E-03 | 1 | 0 | 2486 |
| 215954_s_at  | ENST00000248420 | C19orf29        | -0.25 | 1.56E-02 | 1 | 0 | 339  |
| 218998_at    | ENST00000322940 | C9orf6          | -0.25 | 5.10E-03 | 2 | 1 | 1264 |
| 218998_at    | ENST00000374621 | C9orf6          | -0.25 | 5.10E-03 | 2 | 1 | 1264 |
| 203044_at    | ENST00000254190 | CHSY1           | -0.25 | 1.49E-02 | 1 | 0 | 1660 |
| 221648_s_at  | ENST00000375826 | AGMAT           | -0.25 | 2.11E-02 | 1 | 1 | 994  |
| 201577_at    | ENST00000336097 | NME1            | -0.25 | 2.22E-02 | 1 | 1 | 244  |
| 201577_at    | ENST00000311032 | NME1            | -0.25 | 2.22E-02 | 1 | 1 | 186  |
| 201577_at    | ENST00000393196 | NME1            | -0.25 | 2.22E-02 | 1 | 1 | 186  |
| 203848_at    | ENST00000269701 | AKAP8           | -0.25 | 3.32E-02 | 1 | 1 | 1385 |
| 219486_at    | ENST00000358896 | DUS2L           | -0.25 | 4.48E-02 | 1 | 1 | 316  |
| 215631_s_at  | ENST00000359957 | BRMS1           | -0.25 | 2.52E-02 | 1 | 0 | 549  |
| 207749_s_at  | ENST00000264977 | PPP2R3A         | -0.25 | 3.29E-03 | 3 | 0 | 2725 |
| 207749_s_at  | ENST00000334546 | PPP2R3A         | -0.25 | 3.29E-03 | 3 | 0 | 2725 |
| 202836_s_at  | ENST00000269601 | TXNL4A          | -0.25 | 3.99E-02 | 1 | 0 | 816  |
| 228972_at    | ENST00000313486 | PITPNA          | -0.25 | 2.14E-02 | 1 | 0 | 2568 |
| 226037_s_at  | ENST00000400856 | ENSG00000215760 | -0.25 | 2.93E-02 | 2 | 0 | 1861 |
| 226037_s_at  | ENST00000341864 | TAF9B           | -0.25 | 2.93E-02 | 2 | 0 | 1861 |
| 1554762_a_at | ENST00000281445 | WWC2            | -0.25 | 1.79E-02 | 3 | 2 | 5043 |
| 225756_at    | ENST00000359867 | CSNK1E          | -0.25 | 2.77E-02 | 1 | 0 | 1279 |
| 225756_at    | ENST00000396832 | CSNK1E          | -0.25 | 2.77E-02 | 1 | 0 | 1279 |
| 208840_s_at  | ENST00000359707 | G3BP2           | -0.25 | 3.59E-02 | 2 | 0 | 2647 |
| 208840_s_at  | ENST00000357854 | G3BP2           | -0.25 | 3.59E-02 | 2 | 0 | 2647 |
| 208840_s_at  | ENST00000395719 | G3BP2           | -0.25 | 3.59E-02 | 2 | 0 | 2647 |
| 210059_s_at  | ENST00000211287 | MAPK13          | -0.25 | 4.76E-02 | 1 | 0 | 692  |
| 210059_s_at  | ENST00000373761 | MAPK13          | -0.25 | 4.76E-02 | 1 | 0 | 677  |
| 210059_s_at  | ENST00000373770 | MAPK13          | -0.25 | 4.76E-02 | 1 | 0 | 677  |
| 210059_s_at  | ENST00000373766 | MAPK13          | -0.25 | 4.76E-02 | 1 | 0 | 849  |
| 228517_at    | ENST00000296214 | C1orf149        | -0.25 | 2.16E-02 | 1 | 0 | 785  |
| 228517_at    | ENST00000373075 | C1orf149        | -0.25 | 2.16E-02 | 1 | 0 | 921  |
| 228517_at    | ENST00000373074 | C1orf149        | -0.25 | 2.16E-02 | 1 | 0 | 788  |

|             |                 |                 |       |          |   |   |      |
|-------------|-----------------|-----------------|-------|----------|---|---|------|
| 218947_s_at | ENST00000358107 | PAPD1           | -0.24 | 3.81E-02 | 1 | 1 | 779  |
| 218947_s_at | ENST00000263063 | PAPD1           | -0.24 | 3.81E-02 | 1 | 1 | 779  |
| 204156_at   | ENST00000375288 | ENSG00000160584 | -0.24 | 2.00E-03 | 1 | 0 | 2239 |
| 204156_at   | ENST00000292055 | ENSG00000160584 | -0.24 | 2.00E-03 | 1 | 0 | 2239 |
| 204156_at   | ENST00000375300 | ENSG00000160584 | -0.24 | 2.00E-03 | 1 | 0 | 2241 |
| 223398_at   | ENST00000375464 | C9orf89         | -0.24 | 4.40E-02 | 1 | 0 | 176  |
| 212084_at   | ENST00000272438 | TEX261          | -0.24 | 2.97E-02 | 2 | 1 | 2660 |
| 202095_s_at | ENST00000350051 | BIRC5           | -0.24 | 2.94E-02 | 2 | 0 | 2080 |
| 202095_s_at | ENST00000301633 | BIRC5           | -0.24 | 2.94E-02 | 2 | 0 | 2080 |
| 202095_s_at | ENST00000374948 | BIRC5           | -0.24 | 2.94E-02 | 2 | 0 | 1977 |
| 237159_x_at | ENST00000396654 | AP1S3           | -0.24 | 2.78E-03 | 1 | 0 | 3385 |
| 1552946_at  | ENST00000315849 | ZNF114          | -0.24 | 1.82E-02 | 1 | 0 | 728  |
| 204085_s_at | ENST00000377453 | CLN5            | -0.24 | 1.39E-02 | 1 | 1 | 1547 |
| 232158_x_at | ENST00000295461 | NPAL1           | -0.24 | 1.27E-02 | 1 | 0 | 4001 |
| 213913_s_at | ENST00000229088 | TBC1D30         | -0.24 | 4.40E-02 | 1 | 1 | 2515 |
| 212931_at   | ENST00000335626 | TCF20           | -0.23 | 4.05E-03 | 1 | 1 | 1328 |
| 212931_at   | ENST00000359486 | TCF20           | -0.23 | 4.05E-03 | 1 | 1 | 1390 |
| 223680_at   | ENST00000392143 | ENSG00000198182 | -0.23 | 4.02E-02 | 1 | 0 | 1665 |
| 223680_at   | ENST00000355202 | ENSG00000198182 | -0.23 | 4.02E-02 | 1 | 0 | 1665 |
| 213278_at   | ENST00000221086 | MTMR9           | -0.23 | 1.90E-03 | 4 | 0 | 5355 |
| 226109_at   | ENST00000284881 | C21orf91        | -0.23 | 1.05E-02 | 2 | 0 | 4447 |
| 228363_at   | ENST00000371199 | XIAP            | -0.23 | 3.28E-02 | 3 | 1 | 6791 |
| 228363_at   | ENST00000355640 | XIAP            | -0.23 | 3.28E-02 | 3 | 1 | 6784 |
| 227627_at   | ENST00000396609 | C8orf44         | -0.23 | 3.39E-02 | 2 | 2 | 2612 |
| 209270_at   | ENST00000367030 | LAMB3           | -0.23 | 1.53E-02 | 1 | 1 | 294  |
| 209270_at   | ENST00000391911 | LAMB3           | -0.23 | 1.53E-02 | 1 | 1 | 396  |
| 209270_at   | ENST00000356082 | LAMB3           | -0.23 | 1.53E-02 | 1 | 1 | 396  |
| 229091_s_at | ENST00000265992 | CCNJ            | -0.23 | 3.01E-02 | 1 | 1 | 2624 |
| 222207_x_at | ENST00000320339 | CXorf56         | -0.23 | 4.91E-02 | 1 | 1 | 1578 |
| 224709_s_at | ENST00000360515 | CDC42SE2        | -0.23 | 3.32E-02 | 1 | 0 | 2787 |
| 224709_s_at | ENST00000395246 | CDC42SE2        | -0.23 | 3.32E-02 | 1 | 0 | 2787 |
| 225306_s_at | ENST00000359232 | SLC25A29        | -0.23 | 3.78E-02 | 1 | 0 | 1167 |
| 225306_s_at | ENST00000360662 | SLC25A29        | -0.23 | 3.78E-02 | 1 | 0 | 1167 |
| 225306_s_at | ENST00000392908 | SLC25A29        | -0.23 | 3.78E-02 | 1 | 0 | 1602 |
| 56821_at    | ENST00000219320 | SLC38A7         | -0.23 | 3.15E-02 | 1 | 1 | 991  |
| 222547_at   | ENST00000324219 | MAP4K4          | -0.22 | 5.10E-03 | 3 | 0 | 3440 |
| 222547_at   | ENST00000350878 | MAP4K4          | -0.22 | 5.10E-03 | 3 | 0 | 3440 |
| 222547_at   | ENST00000347699 | MAP4K4          | -0.22 | 5.10E-03 | 3 | 0 | 3440 |
| 222547_at   | ENST00000350198 | MAP4K4          | -0.22 | 5.10E-03 | 3 | 0 | 3440 |
| 222547_at   | ENST00000302217 | MAP4K4          | -0.22 | 5.10E-03 | 3 | 0 | 3440 |
| 226544_x_at | ENST00000244777 | TXNDC5          | -0.22 | 1.98E-03 | 1 | 0 | 1665 |
| 226544_x_at | ENST00000397457 | TXNDC5          | -0.22 | 1.98E-03 | 1 | 0 | 2082 |
| 218751_s_at | ENST00000281708 | FBXW7           | -0.22 | 1.35E-02 | 1 | 0 | 1623 |
| 218751_s_at | ENST00000393956 | FBXW7           | -0.22 | 1.35E-02 | 1 | 0 | 1622 |
| 218751_s_at | ENST00000296555 | FBXW7           | -0.22 | 1.35E-02 | 1 | 0 | 1623 |
| 218751_s_at | ENST00000263981 | FBXW7           | -0.22 | 1.35E-02 | 1 | 0 | 1622 |

|              |                 |                 |       |          |   |   |      |
|--------------|-----------------|-----------------|-------|----------|---|---|------|
| 212619_at    | ENST00000300128 | TMEM194A        | -0.22 | 2.99E-02 | 3 | 1 | 4231 |
| 212619_at    | ENST00000379391 | TMEM194A        | -0.22 | 2.99E-02 | 3 | 1 | 4231 |
| 1554410_a_at | ENST00000329959 | WBSCR16         | -0.22 | 1.51E-02 | 1 | 0 | 855  |
| 213296_at    | ENST00000306256 | RER1            | -0.22 | 3.63E-02 | 1 | 0 | 2311 |
| 202852_s_at  | ENST00000261880 | ENSG00000103591 | -0.22 | 3.16E-02 | 1 | 1 | 1148 |
| 218884_s_at  | ENST00000281543 | GUF1            | -0.22 | 6.57E-03 | 1 | 0 | 1998 |
| 219470_x_at  | ENST00000265992 | CCNJ            | -0.22 | 3.34E-03 | 1 | 1 | 2624 |
| 219092_s_at  | ENST00000287996 | IPPK            | -0.22 | 2.14E-02 | 2 | 1 | 2648 |
| 201691_s_at  | ENST00000379097 | TPD52           | -0.22 | 4.26E-02 | 2 | 1 | 3244 |
| 201691_s_at  | ENST00000379096 | TPD52           | -0.22 | 4.26E-02 | 2 | 1 | 3244 |
| 242804_at    | ENST00000382857 | POLN            | -0.21 | 3.22E-02 | 2 | 0 | 2628 |
| 222481_at    | ENST00000254616 | FXC1            | -0.21 | 1.10E-03 | 1 | 1 | 2459 |
| 243176_at    | ENST00000295087 | ARL5A           | -0.21 | 1.73E-02 | 2 | 0 | 2310 |
| 218060_s_at  | ENST00000219281 | C16orf57        | -0.21 | 3.98E-02 | 1 | 0 | 1372 |
| 238454_at    | ENST00000316433 | ENSG00000171817 | -0.21 | 1.64E-03 | 1 | 1 | 830  |
| 238454_at    | ENST00000343599 | ENSG00000171817 | -0.21 | 1.64E-03 | 1 | 1 | 830  |
| 218421_at    | ENST00000216264 | CERK            | -0.21 | 2.46E-02 | 1 | 1 | 2711 |
| 212852_s_at  | ENST00000367446 | TROVE2          | -0.21 | 3.14E-02 | 1 | 0 | 1582 |
| 218647_s_at  | ENST00000373044 | YRDC            | -0.21 | 3.62E-02 | 1 | 0 | 983  |
| 1555823_at   | ENST00000325438 | PACS2           | -0.21 | 3.93E-02 | 1 | 1 | 3475 |
| 202616_s_at  | ENST00000369957 | MECP2           | -0.21 | 1.38E-02 | 2 | 1 | 8554 |
| 202616_s_at  | ENST00000303391 | MECP2           | -0.21 | 1.38E-02 | 2 | 1 | 8554 |
| 202616_s_at  | ENST00000369964 | MECP2           | -0.21 | 1.38E-02 | 2 | 1 | 8794 |
| 202616_s_at  | ENST00000393671 | MECP2           | -0.21 | 1.38E-02 | 2 | 1 | 8554 |
| 223682_s_at  | ENST00000312234 | EIF1AD          | -0.21 | 8.48E-03 | 1 | 0 | 2053 |
| 221264_s_at  | ENST00000240185 | TARDBP          | -0.21 | 3.14E-02 | 1 | 0 | 2835 |
| 226782_at    | ENST00000310862 | SLC25A30        | -0.20 | 4.62E-02 | 1 | 0 | 2653 |
| 204877_s_at  | ENST00000308893 | TAOK2           | -0.20 | 2.50E-02 | 1 | 0 | 418  |
| 219056_at    | ENST00000336617 | RNASEH2B        | -0.20 | 2.29E-02 | 1 | 0 | 256  |
| 227893_at    | ENST00000321517 | C9orf130        | -0.20 | 2.28E-02 | 1 | 0 | 836  |
| 1553423_a_at | ENST00000285013 | SLFN13          | -0.20 | 1.97E-02 | 3 | 1 | 5499 |
| 1553423_a_at | ENST00000360502 | SLFN13          | -0.20 | 1.97E-02 | 3 | 1 | 5499 |
| 226833_at    | ENST00000332439 | CYB5D1          | -0.20 | 2.62E-02 | 4 | 1 | 2668 |
| 225678_at    | ENST00000355209 | POLR3H          | -0.20 | 1.31E-03 | 2 | 1 | 3479 |
| 225678_at    | ENST00000337566 | POLR3H          | -0.20 | 1.31E-03 | 2 | 1 | 3479 |
| 225678_at    | ENST00000396504 | POLR3H          | -0.20 | 1.31E-03 | 2 | 1 | 3479 |
| 217789_at    | ENST00000362031 | SNX6            | -0.20 | 4.25E-02 | 1 | 1 | 1710 |
| 217789_at    | ENST00000396526 | SNX6            | -0.20 | 4.25E-02 | 1 | 1 | 2028 |
| 1555964_at   | ENST00000336125 | ARL17           | -0.20 | 6.29E-04 | 5 | 3 | 3298 |
| 1555964_at   | ENST00000398255 | ARL17P1         | -0.20 | 6.29E-04 | 5 | 3 | 3298 |
| 223208_at    | ENST00000228495 | KCTD10          | -0.20 | 4.55E-02 | 3 | 0 | 2940 |
| 203307_at    | ENST00000383450 | ENSG00000206412 | -0.20 | 4.06E-02 | 3 | 1 | 4695 |
| 203307_at    | ENST00000383596 | ENSG00000206492 | -0.20 | 4.06E-02 | 3 | 1 | 4695 |
| 204541_at    | ENST00000312932 | SEC14L2         | -0.20 | 1.60E-02 | 1 | 0 | 1432 |
| 213146_at    | ENST00000254846 | JMJD3           | -0.20 | 1.58E-02 | 1 | 0 | 1267 |
| 230134_s_at  | ENST00000373670 | RC3H2           | -0.20 | 2.30E-02 | 1 | 0 | 5071 |

|              |                 |                 |       |          |   |   |       |
|--------------|-----------------|-----------------|-------|----------|---|---|-------|
| 244495_x_at  | ENST00000383233 | C18orf45        | -0.20 | 1.62E-02 | 1 | 0 | 1994  |
| 244495_x_at  | ENST00000256907 | C18orf45        | -0.20 | 1.62E-02 | 1 | 0 | 2356  |
| 231149_s_at  | ENST00000301831 | ULK4            | -0.19 | 5.27E-03 | 1 | 0 | 327   |
| 222551_s_at  | ENST00000331434 | C8orf33         | -0.19 | 1.82E-02 | 1 | 0 | 1872  |
| 41387_r_at   | ENST00000254846 | JMJD3           | -0.19 | 3.36E-02 | 1 | 0 | 1267  |
| 217857_s_at  | ENST00000330165 | RBM8A           | -0.19 | 5.67E-03 | 1 | 0 | 2233  |
| 209624_s_at  | ENST00000340941 | MCCC2           | -0.19 | 2.08E-02 | 1 | 0 | 538   |
| 209624_s_at  | ENST00000323375 | MCCC2           | -0.19 | 2.08E-02 | 1 | 0 | 538   |
| 204024_at    | ENST00000297438 | OSGIN2          | -0.19 | 3.98E-02 | 1 | 1 | 2336  |
| 205207_at    | ENST00000258743 | IL6             | -0.19 | 3.86E-02 | 1 | 0 | 415   |
| 223498_at    | ENST00000395530 | SPECC1          | -0.19 | 3.00E-02 | 3 | 1 | 4961  |
| 225445_at    | ENST00000288561 | ENSG00000157741 | -0.19 | 2.32E-02 | 3 | 0 | 10400 |
| 222561_at    | ENST00000254770 | LANCL2          | -0.18 | 9.85E-03 | 1 | 0 | 2422  |
| 205340_at    | ENST00000230122 | ZBTB24          | -0.18 | 3.90E-02 | 1 | 0 | 3335  |
| 221992_at    | ENST00000359724 | ENSG00000196877 | -0.18 | 3.01E-02 | 1 | 0 | 808   |
| 218362_s_at  | ENST00000377767 | DIS3            | -0.18 | 4.13E-02 | 4 | 0 | 4391  |
| 218362_s_at  | ENST00000377780 | DIS3            | -0.18 | 4.13E-02 | 4 | 0 | 4391  |
| 227880_s_at  | ENST00000316916 | TMEM185A        | -0.18 | 4.10E-02 | 2 | 0 | 1456  |
| 204148_s_at  | ENST00000310842 | POMZP3          | -0.18 | 1.25E-02 | 1 | 0 | 237   |
| 228851_s_at  | ENST00000354702 | ENSA            | -0.18 | 3.79E-02 | 1 | 0 | 2359  |
| 228851_s_at  | ENST00000271690 | ENSA            | -0.18 | 3.79E-02 | 1 | 0 | 2359  |
| 228851_s_at  | ENST00000356527 | ENSA            | -0.18 | 3.79E-02 | 1 | 0 | 2359  |
| 222689_at    | ENST00000278544 | PHCA            | -0.18 | 3.38E-02 | 2 | 1 | 2591  |
| 223532_at    | ENST00000393537 | ANKRD39         | -0.18 | 3.55E-02 | 1 | 1 | 260   |
| 224839_s_at  | ENST00000340124 | GPT2            | -0.18 | 2.43E-02 | 3 | 0 | 2289  |
| 209164_s_at  | ENST00000392975 | CYB561          | -0.18 | 3.44E-02 | 1 | 0 | 2095  |
| 209164_s_at  | ENST00000392976 | CYB561          | -0.18 | 3.44E-02 | 1 | 0 | 2095  |
| 209164_s_at  | ENST00000360793 | CYB561          | -0.18 | 3.44E-02 | 1 | 0 | 2095  |
| 239572_at    | ENST00000241125 | GJA3            | -0.18 | 4.84E-02 | 1 | 0 | 3723  |
| 211784_s_at  | ENST00000258962 | SFRS1           | -0.18 | 1.07E-02 | 2 | 0 | 4483  |
| 213466_at    | ENST00000248139 | RAB40C          | -0.18 | 4.49E-02 | 2 | 0 | 1649  |
| 205995_x_at  | ENST00000310864 | IQCB1           | -0.18 | 3.45E-02 | 1 | 0 | 346   |
| 205995_x_at  | ENST00000349820 | IQCB1           | -0.18 | 3.45E-02 | 1 | 0 | 346   |
| 205995_x_at  | ENST00000393650 | IQCB1           | -0.18 | 3.45E-02 | 1 | 0 | 1121  |
| 219576_at    | ENST00000370661 | MAP7D3          | -0.17 | 4.55E-02 | 1 | 0 | 1824  |
| 226839_at    | ENST00000331552 | NR2C2AP         | -0.17 | 1.99E-02 | 1 | 0 | 508   |
| 219615_s_at  | ENST00000359534 | KCNK5           | -0.17 | 1.96E-03 | 3 | 0 | 1918  |
| 221002_s_at  | ENST00000265450 | TSPAN14         | -0.17 | 1.51E-02 | 1 | 0 | 1652  |
| 221002_s_at  | ENST00000341863 | TSPAN14         | -0.17 | 1.51E-02 | 1 | 0 | 1652  |
| 240437_at    | ENST00000375890 | CASP9           | -0.17 | 3.54E-02 | 1 | 0 | 4662  |
| 233446_at    | ENST00000262095 | ONECUT2         | -0.17 | 8.54E-03 | 8 | 3 | 14574 |
| 232118_at    | ENST00000378868 | CRLS1           | -0.17 | 8.52E-03 | 1 | 0 | 3093  |
| 1555543_a_at | ENST00000356970 | CLCC1           | -0.17 | 2.32E-03 | 1 | 0 | 3039  |
| 1555543_a_at | ENST00000369968 | CLCC1           | -0.17 | 2.32E-03 | 1 | 0 | 3039  |
| 1555543_a_at | ENST00000369969 | CLCC1           | -0.17 | 2.32E-03 | 1 | 0 | 3039  |
| 1555543_a_at | ENST00000369970 | CLCC1           | -0.17 | 2.32E-03 | 1 | 0 | 3039  |



|              |                 |                 |       |          |   |   |      |
|--------------|-----------------|-----------------|-------|----------|---|---|------|
| 155543_a_at  | ENST00000369971 | CLCC1           | -0.17 | 2.32E-03 | 1 | 0 | 3039 |
| 215260_s_at  | ENST00000395423 | TCF3            | -0.17 | 7.68E-03 | 1 | 0 | 2413 |
| 215260_s_at  | ENST00000262965 | TCF3            | -0.17 | 7.68E-03 | 1 | 0 | 2413 |
| 215260_s_at  | ENST00000344749 | TCF3            | -0.17 | 7.68E-03 | 1 | 0 | 2413 |
| 241727_x_at  | ENST00000314636 | DHFRL1          | -0.16 | 2.35E-02 | 1 | 0 | 3024 |
| 241727_x_at  | ENST00000394221 | DHFRL1          | -0.16 | 2.35E-02 | 1 | 0 | 1987 |
| 225042_s_at  | ENST00000228515 | FAM130A1        | -0.16 | 2.74E-02 | 2 | 0 | 2539 |
| 223546_x_at  | ENST00000337351 | LUC7L           | -0.16 | 3.27E-02 | 1 | 0 | 993  |
| 223546_x_at  | ENST00000397783 | LUC7L           | -0.16 | 3.27E-02 | 1 | 1 | 402  |
| 1558426_x_at | ENST00000356387 | ORAI2           | -0.16 | 4.43E-02 | 1 | 0 | 1664 |
| 231249_at    | ENST00000396885 | ENSG00000198198 | -0.16 | 3.60E-02 | 1 | 0 | 2153 |
| 231249_at    | ENST00000372442 | ENSG00000198198 | -0.16 | 3.60E-02 | 1 | 0 | 2153 |
| 226714_at    | ENST00000314471 | SAMD4B          | -0.16 | 1.12E-02 | 1 | 0 | 1368 |
| 212349_at    | ENST00000375749 | POFUT1          | -0.16 | 1.62E-02 | 3 | 0 | 4000 |
| 222885_at    | ENST00000296420 | EMCN            | -0.16 | 5.00E-02 | 1 | 0 | 584  |
| 222885_at    | ENST00000305864 | EMCN            | -0.16 | 5.00E-02 | 1 | 0 | 584  |
| 234688_x_at  | ENST00000380255 | CNTROB          | -0.16 | 7.87E-04 | 1 | 0 | 951  |
| 234688_x_at  | ENST00000380262 | CNTROB          | -0.16 | 7.87E-04 | 1 | 0 | 66   |
| 234688_x_at  | ENST00000303707 | CNTROB          | -0.16 | 7.87E-04 | 1 | 0 | 67   |
| 1565772_at   | ENST00000356341 | PAK1            | -0.16 | 4.35E-02 | 1 | 0 | 1258 |
| 1565772_at   | ENST00000278568 | PAK1            | -0.16 | 4.35E-02 | 1 | 0 | 1283 |
| 1555478_at   | ENST00000335108 | C17orf82        | -0.16 | 2.54E-02 | 1 | 0 | 549  |
| 241367_at    | ENST00000333437 | ENSG00000182459 | -0.16 | 3.22E-02 | 1 | 0 | 1124 |
| 32062_at     | ENST00000292524 | LRRC14          | -0.16 | 2.20E-02 | 1 | 0 | 3695 |
| 203865_s_at  | ENST00000389861 | ADARB1          | -0.16 | 4.34E-02 | 2 | 0 | 2393 |
| 203865_s_at  | ENST00000389863 | ADARB1          | -0.16 | 4.34E-02 | 2 | 0 | 1005 |
| 203865_s_at  | ENST00000348831 | ADARB1          | -0.16 | 4.34E-02 | 2 | 0 | 4362 |
| 203865_s_at  | ENST00000389862 | ADARB1          | -0.16 | 4.34E-02 | 2 | 0 | 2393 |
| 203865_s_at  | ENST00000389860 | ADARB1          | -0.16 | 4.34E-02 | 2 | 0 | 2393 |
| 203865_s_at  | ENST00000360697 | ADARB1          | -0.16 | 4.34E-02 | 2 | 0 | 4363 |
| 220097_s_at  | ENST00000335464 | TMEM104         | -0.16 | 2.51E-02 | 1 | 0 | 1792 |
| 1553995_a_at | ENST00000369651 | NT5E            | -0.15 | 1.28E-02 | 1 | 1 | 1774 |
| 1553995_a_at | ENST00000257770 | NT5E            | -0.15 | 1.28E-02 | 1 | 1 | 1774 |
| 223322_at    | ENST00000304534 | RASSF5          | -0.15 | 4.91E-02 | 1 | 1 | 2305 |
| 223322_at    | ENST00000367117 | RASSF5          | -0.15 | 4.91E-02 | 1 | 1 | 2435 |
| 223322_at    | ENST00000355294 | RASSF5          | -0.15 | 4.91E-02 | 1 | 1 | 2305 |
| 223322_at    | ENST00000338603 | RASSF5          | -0.15 | 4.91E-02 | 1 | 1 | 2245 |
| 206879_s_at  | ENST00000394770 | NRG2            | -0.15 | 3.97E-02 | 1 | 0 | 1573 |
| 212585_at    | ENST00000261183 | OSBPL8          | -0.15 | 4.37E-02 | 1 | 1 | 4080 |
| 212585_at    | ENST00000393249 | OSBPL8          | -0.15 | 4.37E-02 | 1 | 1 | 4080 |
| 225128_at    | ENST00000323468 | KDELC2          | -0.15 | 1.57E-02 | 1 | 1 | 2702 |
| 234734_s_at  | ENST00000315183 | TNRC6A          | -0.15 | 2.72E-02 | 3 | 0 | 1068 |
| 234734_s_at  | ENST00000395801 | TNRC6A          | -0.15 | 2.72E-02 | 4 | 0 | 2417 |
| 234734_s_at  | ENST00000395799 | TNRC6A          | -0.15 | 2.72E-02 | 4 | 0 | 2420 |
| 234734_s_at  | ENST00000352205 | TNRC6A          | -0.15 | 2.72E-02 | 4 | 0 | 2417 |
| 234734_s_at  | ENST00000338120 | TNRC6A          | -0.15 | 2.72E-02 | 4 | 0 | 2417 |

|              |                 |                 |       |          |   |   |       |
|--------------|-----------------|-----------------|-------|----------|---|---|-------|
| 209051_s_at  | ENST00000393160 | RALGDS          | -0.15 | 3.74E-02 | 1 | 1 | 867   |
| 209051_s_at  | ENST00000372062 | RALGDS          | -0.15 | 3.74E-02 | 1 | 1 | 867   |
| 209051_s_at  | ENST00000393157 | RALGDS          | -0.15 | 3.74E-02 | 1 | 1 | 867   |
| 209051_s_at  | ENST00000372050 | RALGDS          | -0.15 | 3.74E-02 | 1 | 1 | 864   |
| 209051_s_at  | ENST00000372047 | RALGDS          | -0.15 | 3.74E-02 | 1 | 1 | 867   |
| 209051_s_at  | ENST00000372051 | RALGDS          | -0.15 | 3.74E-02 | 1 | 1 | 1365  |
| 223571_at    | ENST00000337843 | C1QTNF6         | -0.15 | 4.27E-02 | 1 | 0 | 2022  |
| 218596_at    | ENST00000372648 | TBC1D13         | -0.15 | 3.44E-02 | 1 | 1 | 2545  |
| 218596_at    | ENST00000223865 | TBC1D13         | -0.15 | 3.44E-02 | 1 | 1 | 2545  |
| 227374_at    | ENST00000341597 | EARS2           | -0.15 | 1.46E-02 | 2 | 1 | 2264  |
| 203938_s_at  | ENST00000378541 | TAF1C           | -0.15 | 6.74E-03 | 1 | 1 | 1086  |
| 203938_s_at  | ENST00000341690 | TAF1C           | -0.15 | 6.74E-03 | 1 | 1 | 1086  |
| 213521_at    | ENST00000347849 | PTPN18          | -0.15 | 5.02E-03 | 1 | 1 | 1346  |
| 213521_at    | ENST00000175756 | PTPN18          | -0.15 | 5.02E-03 | 1 | 1 | 1346  |
| 238829_at    | ENST00000261868 | EIF3J           | -0.15 | 2.76E-03 | 3 | 1 | 1654  |
| 204155_s_at  | ENST00000375288 | ENSG00000160584 | -0.15 | 3.03E-02 | 1 | 0 | 2239  |
| 204155_s_at  | ENST00000292055 | ENSG00000160584 | -0.15 | 3.03E-02 | 1 | 0 | 2239  |
| 204155_s_at  | ENST00000375300 | ENSG00000160584 | -0.15 | 3.03E-02 | 1 | 0 | 2241  |
| 1558914_at   | ENST00000346571 | FAM152A         | -0.15 | 4.12E-02 | 1 | 0 | 3244  |
| 203016_s_at  | ENST00000342203 | SSX2IP          | -0.14 | 1.07E-02 | 1 | 1 | 3726  |
| 1570255_s_at | ENST00000358870 | ENSG00000204716 | -0.14 | 4.19E-02 | 1 | 0 | 3969  |
| 218857_s_at  | ENST00000301776 | ASRGL1          | -0.14 | 2.77E-02 | 1 | 0 | 1122  |
| 219328_at    | ENST00000372159 | DDX31           | -0.14 | 4.26E-02 | 1 | 0 | 577   |
| 219328_at    | ENST00000372153 | DDX31           | -0.14 | 4.26E-02 | 1 | 0 | 577   |
| 219328_at    | ENST00000372155 | DDX31           | -0.14 | 4.26E-02 | 1 | 0 | 2155  |
| 222433_at    | ENST00000366843 | ENAH            | -0.14 | 1.96E-02 | 1 | 1 | 10943 |
| 222433_at    | ENST00000366844 | ENAH            | -0.14 | 1.96E-02 | 1 | 1 | 10943 |
| 222433_at    | ENST00000284563 | ENAH            | -0.14 | 1.96E-02 | 1 | 1 | 10943 |
| 222433_at    | ENST00000391874 | ENAH            | -0.14 | 1.96E-02 | 1 | 1 | 10943 |
| 238054_at    | ENST00000375418 | ADPRHL1         | -0.14 | 1.39E-02 | 1 | 0 | 875   |
| 238054_at    | ENST00000356501 | ADPRHL1         | -0.14 | 1.39E-02 | 1 | 0 | 875   |
| 204655_at    | ENST00000366113 | CCL5            | -0.14 | 1.49E-02 | 1 | 1 | 886   |
| 204655_at    | ENST00000293272 | CCL5            | -0.14 | 1.49E-02 | 1 | 1 | 881   |
| 226483_at    | ENST00000334667 | TMEM68          | -0.14 | 4.29E-02 | 1 | 1 | 1371  |
| 209334_s_at  | ENST00000261817 | PSMD9           | -0.14 | 1.63E-02 | 2 | 0 | 1553  |
| 201802_at    | ENST00000393844 | SLC29A1         | -0.14 | 1.73E-02 | 1 | 0 | 623   |
| 201802_at    | ENST00000371755 | SLC29A1         | -0.14 | 1.73E-02 | 1 | 0 | 623   |
| 201802_at    | ENST00000393841 | SLC29A1         | -0.14 | 1.73E-02 | 1 | 0 | 623   |
| 201802_at    | ENST00000313248 | SLC29A1         | -0.14 | 1.73E-02 | 1 | 0 | 613   |
| 201802_at    | ENST00000371740 | SLC29A1         | -0.14 | 1.73E-02 | 1 | 0 | 613   |
| 201802_at    | ENST00000371731 | SLC29A1         | -0.14 | 1.73E-02 | 1 | 0 | 613   |
| 201802_at    | ENST00000371724 | SLC29A1         | -0.14 | 1.73E-02 | 1 | 0 | 613   |
| 201802_at    | ENST00000371713 | SLC29A1         | -0.14 | 1.73E-02 | 1 | 0 | 613   |
| 201802_at    | ENST00000371708 | SLC29A1         | -0.14 | 1.73E-02 | 1 | 0 | 613   |
| 1554827_a_at | ENST00000254235 | ADCY7           | -0.14 | 3.13E-02 | 1 | 0 | 2619  |
| 1554827_a_at | ENST00000394697 | ADCY7           | -0.14 | 3.13E-02 | 1 | 0 | 2630  |

|              |                 |                 |       |          |   |   |      |
|--------------|-----------------|-----------------|-------|----------|---|---|------|
| 228857_at    | ENST00000383450 | ENSG00000206412 | -0.14 | 1.99E-02 | 3 | 1 | 4695 |
| 228857_at    | ENST00000383596 | ENSG00000206492 | -0.14 | 1.99E-02 | 3 | 1 | 4695 |
| 217411_s_at  | ENST00000379933 | RREB1           | -0.13 | 4.22E-02 | 1 | 0 | 1994 |
| 217411_s_at  | ENST00000349384 | RREB1           | -0.13 | 4.22E-02 | 1 | 0 | 1994 |
| 217411_s_at  | ENST00000334984 | RREB1           | -0.13 | 4.22E-02 | 1 | 0 | 1994 |
| 217411_s_at  | ENST00000379938 | RREB1           | -0.13 | 4.22E-02 | 1 | 0 | 3012 |
| 230053_at    | ENST00000278505 | ENDOD1          | -0.13 | 3.44E-02 | 1 | 0 | 3072 |
| 228012_at    | ENST00000394800 | MATR3           | -0.13 | 3.80E-02 | 1 | 1 | 2276 |
| 209695_at    | ENST00000329397 | PTP4A3          | -0.13 | 2.69E-02 | 1 | 0 | 476  |
| 209695_at    | ENST00000349124 | PTP4A3          | -0.13 | 2.69E-02 | 1 | 0 | 476  |
| 209695_at    | ENST00000327627 | PTP4A3          | -0.13 | 2.69E-02 | 1 | 0 | 476  |
| 218553_s_at  | ENST00000284006 | KCTD15          | -0.13 | 1.28E-02 | 2 | 1 | 2437 |
| 206034_at    | ENST00000353706 | SERPINB8        | -0.13 | 3.73E-03 | 1 | 0 | 2093 |
| 206034_at    | ENST00000397985 | SERPINB8        | -0.13 | 3.73E-03 | 1 | 0 | 2093 |
| 242866_x_at  | ENST00000292077 | POU2F2          | -0.13 | 3.00E-02 | 2 | 0 | 3029 |
| 242866_x_at  | ENST00000389341 | POU2F2          | -0.13 | 3.00E-02 | 2 | 0 | 3029 |
| 206240_s_at  | ENST00000343979 | ENSG00000196646 | -0.13 | 4.89E-03 | 1 | 1 | 1247 |
| 227292_at    | ENST00000294244 | C11orf84        | -0.13 | 4.45E-02 | 1 | 0 | 540  |
| 225986_x_at  | ENST00000298875 | CPSF2           | -0.13 | 8.94E-04 | 2 | 1 | 2455 |
| 225867_at    | ENST00000304735 | VASN            | -0.13 | 8.00E-06 | 1 | 1 | 629  |
| 1552914_a_at | ENST00000318443 | CD276           | -0.12 | 4.25E-02 | 2 | 1 | 1553 |
| 1552914_a_at | ENST00000318424 | CD276           | -0.12 | 4.25E-02 | 2 | 1 | 1553 |
| 225041_at    | ENST00000361479 | MPHOSPH8        | -0.12 | 4.69E-02 | 1 | 1 | 623  |
| 225041_at    | ENST00000360754 | MPHOSPH8        | -0.12 | 4.69E-02 | 1 | 1 | 691  |
| 222245_s_at  | ENST00000400461 | ENSG00000088340 | -0.12 | 2.40E-02 | 1 | 0 | 2805 |
| 222245_s_at  | ENST00000300494 | ENSG00000088340 | -0.12 | 2.40E-02 | 1 | 0 | 3201 |
| 220262_s_at  | ENST00000357338 | DLK2            | -0.12 | 9.70E-03 | 1 | 0 | 185  |
| 220262_s_at  | ENST00000372488 | DLK2            | -0.12 | 9.70E-03 | 1 | 0 | 185  |
| 220262_s_at  | ENST00000372485 | DLK2            | -0.12 | 9.70E-03 | 1 | 0 | 187  |
| 220262_s_at  | ENST00000372496 | DLK2            | -0.12 | 9.70E-03 | 1 | 0 | 801  |
| 217262_s_at  | ENST00000262738 | CELSR1          | -0.12 | 3.22E-02 | 2 | 0 | 2344 |
| 202328_s_at  | ENST00000382481 | PKD1            | -0.12 | 7.83E-03 | 2 | 0 | 4949 |
| 208072_s_at  | ENST00000264057 | DGKD            | -0.12 | 2.13E-02 | 1 | 1 | 2637 |
| 242141_at    | ENST00000398283 | HDAC2           | -0.12 | 3.46E-02 | 2 | 1 | 4893 |
| 64899_at     | ENST00000251473 | ENSG00000105520 | -0.12 | 1.71E-02 | 1 | 0 | 1317 |
| 243868_at    | ENST00000381992 | RFX3            | -0.12 | 3.67E-02 | 1 | 0 | 1920 |
| 212583_at    | ENST00000156471 | AQR             | -0.11 | 4.54E-02 | 1 | 0 | 1243 |
| 229721_x_at  | ENST00000318109 | DERL3           | -0.11 | 4.25E-02 | 2 | 0 | 2364 |
| 229721_x_at  | ENST00000290730 | DERL3           | -0.11 | 4.25E-02 | 2 | 0 | 2555 |
| 218114_at    | ENST00000343632 | GGA1            | -0.11 | 2.70E-02 | 1 | 1 | 852  |
| 218114_at    | ENST00000325180 | GGA1            | -0.11 | 2.70E-02 | 1 | 1 | 852  |
| 218114_at    | ENST00000337437 | GGA1            | -0.11 | 2.70E-02 | 1 | 1 | 852  |
| 210424_s_at  | ENST00000360553 | GOLGA8A         | -0.11 | 8.28E-03 | 1 | 0 | 2343 |
| 210424_s_at  | ENST00000359187 | GOLGA8A         | -0.11 | 8.28E-03 | 1 | 0 | 2347 |
| 210424_s_at  | ENST00000341650 | GOLGA8B         | -0.11 | 8.28E-03 | 1 | 0 | 419  |
| 210424_s_at  | ENST00000267731 | GOLGA8B         | -0.11 | 8.28E-03 | 1 | 0 | 1975 |

|              |                 |                 |       |          |   |   |       |
|--------------|-----------------|-----------------|-------|----------|---|---|-------|
| 220813_at    | ENST00000282018 | CYSLTR2         | -0.11 | 8.08E-03 | 1 | 1 | 1504  |
| 229912_at    | ENST00000389530 | SDK1            | -0.11 | 4.29E-02 | 1 | 0 | 3616  |
| 229912_at    | ENST00000389531 | SDK1            | -0.11 | 4.29E-02 | 1 | 0 | 1024  |
| 236436_at    | ENST00000398802 | SLC25A45        | -0.11 | 1.78E-02 | 1 | 0 | 1215  |
| 236436_at    | ENST00000294187 | SLC25A45        | -0.11 | 1.78E-02 | 1 | 0 | 1215  |
| 236436_at    | ENST00000377152 | SLC25A45        | -0.11 | 1.78E-02 | 1 | 0 | 1215  |
| 235553_at    | ENST00000394105 | GAPVD1          | -0.11 | 4.98E-02 | 1 | 0 | 2264  |
| 235553_at    | ENST00000394104 | GAPVD1          | -0.11 | 4.98E-02 | 1 | 0 | 2264  |
| 235553_at    | ENST00000394101 | GAPVD1          | -0.11 | 4.98E-02 | 1 | 0 | 4461  |
| 235553_at    | ENST00000394083 | GAPVD1          | -0.11 | 4.98E-02 | 1 | 0 | 2264  |
| 235553_at    | ENST00000265956 | GAPVD1          | -0.11 | 4.98E-02 | 1 | 0 | 3647  |
| 223986_x_at  | ENST00000382255 | DMRT2           | -0.11 | 2.42E-02 | 1 | 0 | 1352  |
| 223986_x_at  | ENST00000259622 | DMRT2           | -0.11 | 2.42E-02 | 1 | 0 | 1778  |
| 223741_s_at  | ENST00000269346 | TTYH2           | -0.11 | 2.32E-02 | 2 | 0 | 1807  |
| 223131_s_at  | ENST00000302424 | TRIM8           | -0.10 | 1.28E-03 | 1 | 0 | 963   |
| 223131_s_at  | ENST00000369896 | TRIM8           | -0.10 | 1.28E-03 | 1 | 0 | 1053  |
| 205096_at    | ENST00000395270 | ENSG00000196313 | -0.10 | 2.37E-02 | 1 | 0 | 2970  |
| 204303_s_at  | ENST00000382998 | KIAA0427        | -0.10 | 3.42E-02 | 2 | 1 | 3648  |
| 204303_s_at  | ENST00000256413 | KIAA0427        | -0.10 | 3.42E-02 | 2 | 1 | 3648  |
| 219190_s_at  | ENST00000373210 | EIF2C4          | -0.10 | 1.24E-02 | 1 | 1 | 3214  |
| 219190_s_at  | ENST00000397882 | EIF2C4          | -0.10 | 1.24E-02 | 1 | 1 | 3214  |
| 234871_at    | ENST00000399043 | GPR98           | -0.10 | 4.29E-02 | 6 | 1 | 12263 |
| 228096_at    | ENST00000322753 | C1orf151        | -0.09 | 4.58E-02 | 1 | 0 | 1913  |
| 232217_at    | ENST00000368599 | FAM26E          | -0.09 | 3.24E-02 | 1 | 1 | 2556  |
| 206764_x_at  | ENST00000344987 | MPPE1           | -0.09 | 4.73E-02 | 1 | 0 | 375   |
| 206764_x_at  | ENST00000309976 | MPPE1           | -0.09 | 4.73E-02 | 2 | 0 | 974   |
| 206764_x_at  | ENST00000317235 | MPPE1           | -0.09 | 4.73E-02 | 2 | 0 | 974   |
| 241910_x_at  | ENST00000336125 | ARL17           | -0.09 | 4.25E-02 | 5 | 3 | 3298  |
| 241910_x_at  | ENST00000398255 | ARL17P1         | -0.09 | 4.25E-02 | 5 | 3 | 3298  |
| 1555393_s_at | ENST00000397841 | C21orf67        | -0.09 | 2.23E-02 | 1 | 0 | 1400  |
| 204967_at    | ENST00000380913 | SHROOM2         | -0.09 | 1.61E-02 | 1 | 0 | 2504  |
| 1556896_at   | ENST00000371639 | ENSG00000203999 | -0.09 | 4.29E-02 | 1 | 0 | 1931  |
| 206012_at    | ENST00000366820 | LEFTY2          | -0.09 | 3.62E-02 | 1 | 0 | 837   |
| 234676_s_at  | ENST00000303775 | N6AMT1          | -0.09 | 2.69E-02 | 2 | 0 | 4194  |
| 234676_s_at  | ENST00000351429 | N6AMT1          | -0.09 | 2.69E-02 | 2 | 0 | 4194  |
| 226623_at    | ENST00000373880 | PHYHIPL         | -0.09 | 4.59E-02 | 1 | 1 | 1699  |
| 226623_at    | ENST00000373878 | PHYHIPL         | -0.09 | 4.59E-02 | 1 | 1 | 2183  |
| 236087_at    | ENST00000400045 | ABLIM2          | -0.09 | 5.64E-03 | 1 | 0 | 688   |
| 236087_at    | ENST00000341937 | ABLIM2          | -0.09 | 5.64E-03 | 1 | 0 | 688   |
| 236087_at    | ENST00000296372 | ABLIM2          | -0.09 | 5.64E-03 | 1 | 0 | 688   |
| 236087_at    | ENST00000361581 | ABLIM2          | -0.09 | 5.64E-03 | 1 | 0 | 688   |
| 236087_at    | ENST00000361737 | ABLIM2          | -0.09 | 5.64E-03 | 1 | 0 | 688   |
| 236087_at    | ENST00000318888 | ABLIM2          | -0.09 | 5.64E-03 | 1 | 0 | 688   |
| 242957_at    | ENST00000335613 | VWCE            | -0.08 | 3.53E-02 | 1 | 1 | 389   |
| 236638_at    | ENST00000321420 | FAM123C         | -0.08 | 4.88E-02 | 1 | 0 | 3476  |
| 238437_at    | ENST00000354309 | ZNF805          | -0.08 | 4.78E-02 | 2 | 0 | 7588  |

|             |                 |                 |       |          |   |   |      |
|-------------|-----------------|-----------------|-------|----------|---|---|------|
| 242746_at   | ENST00000355818 | KLHDC10         | -0.08 | 3.57E-03 | 1 | 0 | 3007 |
| 228342_s_at | ENST00000258888 | ALPK3           | -0.08 | 4.01E-02 | 1 | 0 | 5023 |
| 213679_at   | ENST00000355689 | TTC30A          | -0.08 | 3.19E-02 | 1 | 0 | 2406 |
| 215122_at   | ENST00000321694 | ZNF688          | -0.07 | 4.26E-02 | 1 | 0 | 1290 |
| 229929_at   | ENST00000393014 | SPSB4           | -0.07 | 4.30E-02 | 1 | 1 | 1341 |
| 229929_at   | ENST00000310546 | SPSB4           | -0.07 | 4.30E-02 | 1 | 1 | 1341 |
| 1552410_at  | ENST00000272367 | CLEC4F          | -0.07 | 4.19E-03 | 1 | 0 | 621  |
| 233437_at   | ENST00000264318 | GABRA4          | -0.07 | 5.25E-03 | 1 | 0 | 9323 |
| 203568_s_at | ENST00000349458 | TRIM38          | -0.06 | 4.26E-02 | 1 | 0 | 1433 |
| 203568_s_at | ENST00000357085 | TRIM38          | -0.06 | 4.26E-02 | 1 | 0 | 1383 |
| 206780_at   | ENST00000259271 | GAD2            | -0.06 | 3.44E-02 | 1 | 0 | 559  |
| 206780_at   | ENST00000376261 | GAD2            | -0.06 | 3.44E-02 | 2 | 0 | 3597 |
| 224704_at   | ENST00000395801 | TNRC6A          | -0.06 | 2.12E-02 | 4 | 0 | 2417 |
| 224704_at   | ENST00000395799 | TNRC6A          | -0.06 | 2.12E-02 | 4 | 0 | 2420 |
| 224704_at   | ENST00000352205 | TNRC6A          | -0.06 | 2.12E-02 | 4 | 0 | 2417 |
| 224704_at   | ENST00000338120 | TNRC6A          | -0.06 | 2.12E-02 | 4 | 0 | 2417 |
| 221667_s_at | ENST00000281938 | HSPB8           | -0.05 | 4.34E-02 | 1 | 0 | 887  |
| 201869_s_at | ENST00000217964 | TBL1X           | -0.05 | 3.20E-02 | 2 | 0 | 3491 |
| 238613_at   | ENST00000338983 | ENSG00000091436 | -0.05 | 1.10E-02 | 2 | 0 | 5613 |
| 208253_at   | ENST00000340550 | SIGLEC8         | -0.05 | 2.41E-02 | 1 | 0 | 1381 |
| 208253_at   | ENST00000321424 | SIGLEC8         | -0.05 | 2.41E-02 | 1 | 0 | 1381 |
| 208169_s_at | ENST00000354608 | PTGER3          | -0.03 | 1.21E-02 | 1 | 1 | 699  |
| 212707_s_at | ENST00000262940 | RASA4           | -0.03 | 2.88E-02 | 1 | 0 | 3099 |
| 213809_x_at | ENST00000344749 | TCF3            | -0.02 | 2.74E-02 | 1 | 0 | 2413 |
